1           **Calcium-independent but voltage-dependent secretion (CivDS) mediates**  
2                           **synaptic transmission in a mammalian central synapse**

3  
4           Yuan Wang<sup>1, †</sup>, Rong Huang<sup>1, †</sup>, Zuying Chai<sup>1, †</sup>, Changhe Wang<sup>6, †</sup>, Xingyu  
5                   Du<sup>1,2</sup>, Yuqi Hang<sup>1,2</sup>, Yongxin Xu<sup>1</sup>, Jie Li<sup>1</sup>, Xiaohan Jiang<sup>1</sup>, Xi Wu<sup>1,2</sup>,  
6                   Zhongjun Qiao<sup>1</sup>, Yinglin Li<sup>1</sup>, Bing Liu<sup>1</sup>, Xianying Zhang<sup>5</sup>, Peng Cao<sup>5</sup>,  
7                                   Feipeng Zhu<sup>1</sup> and Zhuan Zhou<sup>1-4, \*</sup>

8  
9           <sup>1</sup>State Key Laboratory of Membrane Biology, Institute of Molecular Medicine,  
10           Peking University, Beijing 100871, China; <sup>2</sup>Peking-Tsinghua Center for Life  
11           Sciences, Beijing 100871, China; <sup>3</sup>PKU-IDG/McGovern Institute for Brain Research,  
12           Beijing 100871, China; <sup>4</sup>Beijing Key Laboratory of Cardiometabolic Molecular  
13           Medicine, Beijing 100871, China; <sup>5</sup>National Institute of Biological Sciences, Beijing  
14           102206, China; <sup>6</sup>School of Life Science and Technology, Xi'an Jiaotong University,  
15                                   Xi'an 710049, China.

16  
17           †Equal contributors

18           \*For correspondence: [zzhou@pku.edu.cn](mailto:zzhou@pku.edu.cn)

19           Competing interests: The authors declare no competing interests.

20  
21           **Address for editorial correspondence and proof:**

22           Dr. Zhuan Zhou  
23           Institute of Molecular Medicine,  
24           Peking University  
25           5 Yiheyuan Road,  
26           Beijing 100871, China  
27           Tel & Fax: ++86-10-6275-3212  
28           Email: [zzhou@pku.edu.cn](mailto:zzhou@pku.edu.cn)

29

30

31 **Abstract**

32 A central principle of synaptic transmission is that action potential-induced  
33 presynaptic neurotransmitter release occurs exclusively *via* Ca<sup>2+</sup>-dependent secretion  
34 (CDS). The discovery and mechanistic investigations of Ca<sup>2+</sup>-independent but  
35 voltage-dependent secretion (CiVDS) have demonstrated that the action potential *per*  
36 *se* is sufficient to trigger neurotransmission in the somata of primary sensory and  
37 sympathetic neurons in mammals. One key question remains, however, whether  
38 CiVDS contributes to central synaptic transmission. Here we report, in the central  
39 transmission from presynaptic (dorsal root ganglion) to postsynaptic (spinal dorsal  
40 horn) neurons, (1) excitatory postsynaptic currents (EPSCs) are mediated by  
41 glutamate transmission through both CiVDS (up to 87%) and CDS; (2)  
42 CiVDS-EPSCs are independent of extracellular and intracellular Ca<sup>2+</sup>; (3) CiVDS  
43 is >100 times faster than CDS in vesicle recycling with much less short-term  
44 depression; (4) the fusion machinery of CiVDS includes Cav2.2 (voltage sensor) and  
45 SNARE (fusion pore). Together, an essential component of activity-induced EPSCs is  
46 mediated by CiVDS in a central synapse.

47

48 **Keywords:** Ca<sup>2+</sup>-dependent secretion, Ca<sup>2+</sup>-independent but voltage-dependent  
49 secretion (CiVDS), synaptic transmission, dorsal root ganglion, dorsal horn,  
50 excitatory postsynaptic currents, Cav2.2, SNARE

51

## 52 **Introduction**

53 The tight coupling of synaptic neurotransmitter release to the action potential within a  
54 millisecond is critical for neuronal communication and brain function (Augustine,  
55 Charlton, & Smith, 1987; Hopfield, 1995; Neher & Sakaba, 2008; Sabatini & Regehr,  
56 1996). The classical view of synaptic transmission is based on the “Ca<sup>2+</sup> hypothesis”:  
57 presynaptic membrane depolarization opens voltage-gated Ca<sup>2+</sup> channels (VGCCs),  
58 which leads to Ca<sup>2+</sup> influx into the cytosol and triggers vesicular neurotransmitter  
59 release (Augustine et al., 1987; Geppert et al., 1994; Jackson & Chapman, 2006; Katz  
60 & Miledi, 1967; Neher & Sakaba, 2008; Sudhof, 2012). In this half-century dogma,  
61 synaptic transmission is directly triggered by Ca<sup>2+</sup>, synaptotagmin, and SNARE  
62 complex assembly (Jahn & Scheller, 2006; Sollner et al., 1993), or membrane  
63 depolarization triggers synaptic transmission indirectly by mediating Ca<sup>2+</sup> influx  
64 through VGCCs (Felmy, Neher, & Schneggenburger, 2003; Jackson & Chapman,  
65 2006; Meinrenken, Borst, & Sakmann, 2003; Nanou & Catterall, 2018; Neher &  
66 Zucker, 1993; Parnas & Parnas, 2010). Since 2002, this Ca<sup>2+</sup> hypothesis has  
67 encountered exceptions in a series of reports on Ca<sup>2+</sup>-independent but  
68 voltage-dependent secretion (CiVDS) in primary sensory dorsal root ganglion (DRG)  
69 neurons (Chai et al., 2017; Huang et al., 2019; C. Zhang et al., 2004; C. Zhang &  
70 Zhou, 2002; Zheng et al., 2009), where action potentials *per se* directly trigger  
71 somatic vesicular exocytosis.

72 In addition to the DRG (C. Zhang & Zhou, 2002), somatic CiVDS has been  
73 extended to trigeminal ganglion neurons (Sforna, Franciolini, & Catacuzzeno, 2019),

74 sympathetic superior cervical ganglion neurons, and neuroendocrine chromaffin cells  
75 (Huang et al., 2019; Moya-Diaz et al., 2019). Further studies have revealed unique  
76 features of CiVDS compared with Ca<sup>2+</sup>-dependent secretion (CDS): (1) rather than  
77 slow and dynamin-dependent endocytosis following CDS (Artalejo, Elhamdani, &  
78 Palfrey, 2002; Ferguson et al., 2007; Wu et al., 2019), CiVDS is coupled to a fast and  
79 dynamin-independent but protein kinase A-dependent endocytosis (C. Zhang et al.,  
80 2004); (2) the vesicle pool replenishment of CiVDS is much faster than that of CDS  
81 (Huang et al., 2019; C. Zhang & Zhou, 2002); (3) at the single-vesicle level, CiVDS  
82 has a smaller quantal size and faster release kinetics (Huang et al., 2019); and (4)  
83 VGCC activation plays dual roles --- indirectly triggering CDS *via* Ca<sup>2+</sup>-influx, and  
84 directly triggering CiVDS through the “synprint” binding domain between VGCC and  
85 SNARE (Chai et al., 2017; Huang et al., 2019; Nanou & Catterall, 2018). This enables  
86 a faster on/off-gating for vesicle fusion *via* CiVDS in somata (Chai et al., 2017;  
87 Huang et al., 2019; Liu et al., 2011). The key question remains, however, whether  
88 CiVDS occurs in synaptic transmission.

89 In the present study, by combining electrophysiological recordings, live-cell  
90 pHluorin imaging, optogenetic stimulation, and genetic manipulations, we report that  
91 CiVDS is present in the central synapses between presynaptic DRG and postsynaptic  
92 spinal dorsal horn (DH) neurons. The CiVDS-EPSC has much less short-term  
93 depression than that of CDS-EPSC, and predominates during sustained neuronal  
94 activity. Altogether, this work provides the first example of CiVDS-mediated synaptic  
95 transmission and demonstrates complementary roles of CiVDS and CDS under

96 physiological conditions.

97

## 98 **Results**

### 99 **CiVDS mediates synaptic transmission in co-cultured DRG and DH neurons**

100 Our previous reports have shown robust CiVDS in the somata of freshly-isolated  
101 DRG neurons (Chai et al., 2017; C. Zhang et al., 2004; C. Zhang & Zhou, 2002;  
102 Zheng et al., 2009). To investigate whether CiVDS functions in synapses, we  
103 co-cultured DRG neurons with postsynaptic DH neurons in which excitatory  
104 postsynaptic currents (EPSCs) were collected with whole-cell patch-clamp recordings  
105 (**Figure 1A**). Strikingly, local pulses of electrical field stimulation evoked EPSCs in  
106 postsynaptic DH neurons, even in 1 mM EGTA (a potent  $\text{Ca}^{2+}$  chelator)-containing  
107  $\text{Ca}^{2+}$ -free (0Ca) bath solution (**Figure 1A**). Intracellular  $\text{Ca}^{2+}$  ( $[\text{Ca}^{2+}]_i$ ) recording  
108 validated that there was indeed no  $[\text{Ca}^{2+}]_i$  rise during recordings in the 0Ca solution  
109 (**Figures 1A, Figure1-figure supplement 1**). The amplitude of EPSCs in 0Ca solution  
110 was ~50% of that in the standard 2 mM  $\text{Ca}^{2+}$  (2Ca) solution (**Figure 1D**). In contrast,  
111 the EPSCs recorded in cultured hippocampal neurons were fully dependent on  
112 extracellular  $\text{Ca}^{2+}$  (**Figure 1B**), indicating the absence of CiVDS during synaptic  
113 transmission in hippocampal neurons and confirming that the 1 mM EGTA-containing  
114  $\text{Ca}^{2+}$ -free solution was sufficient to block  $\text{Ca}^{2+}$  transient at synapses.

115 To further exclude the possible contribution of intracellular microdomain  $\text{Ca}^{2+}$ ,  
116 BAPTA-AM, a potent  $\text{Ca}^{2+}$  chelator, were pre-loaded into the co-cultured neurons.  
117 Consistent with our previous reports on somatic secretion (Chai et al., 2017; Huang et

118 al., 2019; C. Zhang & Zhou, 2002), BAPTA had no effect on the EPSCs recorded in  
119 the 0Ca solution, but reduced the EPSCs recorded in 2Ca to that in 0Ca (**Figure**  
120 **1C-D**). Thus, under physiological conditions (2Ca), the evoked EPSC contains both a  
121 CiVDS-mediated EPSC (CiVDS-EPSC), and a pure CDS-mediated EPSC  
122 (CDS-EPSC), or EPSC (2Ca) = CiVDS-EPSC + CDS-EPSC.

123 We next assessed the vesicle recycling rate by using paired-pulse stimuli with  
124 different time intervals. Consistent with our previous findings in somatic secretion (C.  
125 Zhang & Zhou, 2002), the 80% recovery of the total (CiVDS + CDS) EPSC recorded  
126 in 2Ca solution required >5 s intervals (**Figure 1E-F**). In contrast, 80% recovery of  
127 the CiVDS-EPSC was achieved within 50 ms (**Figure 1E**), indicating a >100 times  
128 faster recycling rate/replenishment of vesicle pools in CiVDS than that in CDS in  
129 DRG synaptic terminals. In addition, we used physiological 10-Hz train stimulation to  
130 evaluate the contribution of CiVDS during sustained synaptic transmission (Fang,  
131 McMullan, Lawson, & Djouhri, 2005; Xu, Huang, & Zhao, 2000; Zheng et al., 2009).  
132 Intriguingly, CiVDS-EPSCs showed much less short-term depression than the total  
133 EPSCs in 2Ca solution (**Figure 1G-H, Figure 1-figure supplement 2**). Importantly,  
134 the CiVDS-EPSC contributed 49% of the total EPSC (in amplitude) recorded in the  
135 2Ca bath (CiVDS-EPSC + CDS-EPSC) during single-pulse stimulation, and this  
136 increased to 87% during 10-Hz train stimulation (**Figures 1H, Figure 1-figure**  
137 **supplement 2**), suggesting that, in contrast to CDS, CiVDS makes a dominant  
138 contribution during sustained neural activity (**Figures 1I, Figure 1-figure supplement**  
139 **2**).

140 In addition, we performed live-cell imaging of synaptophysin (Spy)-pHluorin in the  
141 nerve terminals of DRG neurons co-cultured with DH neurons. Consistent with EPSC  
142 recordings, an electrical field stimulation (20 Hz, 20 s) induced a notable increase of  
143 the Spy-pHluorin signal in either 0Ca or 2Ca bath solution (*Figure 2A–C, Figure*  
144 *2-video 1 and Figure 2-video 2*). Similar to electrophysiological results during 10-Hz  
145 stimulation (*Figure 1-figure supplement 2C*), the peak amplitude of  $\Delta F/F_0$  evoked in  
146 0Ca solution was 77% of that evoked in 2Ca solution, further confirming the  
147 dominant contribution of CiVDS during sustained neural activity (*Figure 2C*).  
148 However, the same electrical stimulation triggered Spy-pHluorin exocytosis in  
149 hippocampal nerve terminals only in 2Ca solution, but not 0Ca solution (*Figure 2D–F,*  
150 *Figure 2-video 3 and Figure 2-video 4*). Thus, CiVDS mediates synaptic  
151 transmission in co-cultured DRG and DH neurons.

### 152 **CiVDS-EPSC is mediated by glutamate release from presynaptic DRG neurons**

153 To determine whether the CiVDS-EPSC is mediated by presynaptic glutamate release,  
154 we tested the effects of ionic glutamate receptor blockers (D-AP5 for NMDA receptor  
155 and CNQX for AMPA receptor (Trussell, Zhang, & Raman, 1993; C. Wang et al.,  
156 2016)). Three minutes of exposure to AP5 (50  $\mu$ M) and CNQX (10  $\mu$ M) diminished  
157 the EPSCs in both the 0Ca and 2Ca solutions (*Figure 3A–B*). As a control, there was  
158 only minimal run-down during repeated stimulation of CiVDS-EPSCs (*Figure*  
159 *3-figure supplement 1*). Furthermore, 3-min treatment with 100  $\mu$ M cyclothiazide  
160 (CTZ), a blocker of AMPA receptor desensitization (Fucile, Milei, & Eusebi, 2006),  
161 greatly slowed the decay and increased the charge of the EPSC in both the 0Ca and

162 2Ca solutions (**Figure 3C-D**). Thus, the CiVDS-EPSC is mediated by synaptic  
163 glutamate transmission in co-cultured DRG and DH neurons.

164 To determine whether DRG neurons are responsible for the presynaptic glutamate  
165 release in CiVDS-EPSCs, we performed paired whole-cell recordings to examine the  
166 specific synaptic transmission between the patched presynaptic DRG (current-clamp)  
167 and postsynaptic DH neurons (voltage-clamp). EPSC traces were recorded in the  
168 standard 2Ca bath within 1 min and 0Ca bath 5 min after whole-cell dialysis, in which  
169 10 mM BAPTA was whole-cell dialyzed into the patched DRG neuron (**Figure 4A**) to  
170 ensure the intracellular Ca<sup>2+</sup>-free condition (**Figure 4A**). A single pulse of current  
171 injection (5 ms, 1000 pA) after break-in triggered an action potential in the  
172 presynaptic DRG neuron, followed by an EPSC in the postsynaptic DH neuron in 2Ca  
173 bath solution (**Figure 4B**). Strikingly, a notable EPSC signal (~40%) remained 5 min  
174 after whole-cell dialysis even though the patched neurons were bathed in 1 mM  
175 EGTA-containing Ca<sup>2+</sup>-free solution (**Figure 4B**). In contrast, similar Ca<sup>2+</sup>-free  
176 treatment completely blocked the EPSCs in hippocampal neurons (**Figure 4C-D**).  
177 Thus, CiVDS-mediated transmitter release from the presynaptic DRG neurons  
178 contributes to EPSC signals in the postsynaptic DH neurons.

179 We next used an optogenetic approach to specifically activate DRG neurons by  
180 expressing channelrhodopsin-2 (ChR2) in DRG neurons with AAV2/9 virus before the  
181 co-culture with DH neurons (**Figure 4E-F**). The transient application of 475-nm light  
182 evoked action potentials in ChR2-expressing DRG neurons (**Figure 4-figure**  
183 **supplement 1**). Importantly, the light-activation of DRG neurons also induced EPSCs



184 in DH neurons bathed in either 0Ca or 2Ca solution, and these were fully abolished by  
185 the blockade of ionic glutamate receptors with D-AP5 and CNQX (**Figure 4G**).  
186 Together, these findings demonstrate that an action potential *per se* is able to directly  
187 trigger presynaptic glutamate release independent of Ca<sup>2+</sup> influx during the synaptic  
188 transmission from presynaptic DRG terminals to postsynaptic central DH neurons.

189

### 190 **CiVDS-EPSC is mediated by SNARE complex and N-type Ca<sup>2+</sup>-channels**

191 To determine whether the CiVDS-EPSC is mediated by SNARE-dependent vesicular  
192 exocytosis, we performed DRG neuron-restricted knockout of synaptobrevin 2  
193 (Syb2/VAMP2) by infecting DRG neurons from homozygous floxed Syb2-null mice  
194 with Cre recombinase-carrying AAV2/5 virus (**Figure 5A**). Western blots showed the  
195 complete loss of Syb2 in DRG neurons infected with Cre virus (**Figure 5B**).  
196 Strikingly, the CiVDS-EPSC in DRG–DH transmission was substantially reduced by  
197 the Syb2-knockout (**Figure 5C**). Thus, similar to CiVDS in somatic secretion (Chai et  
198 al., 2017), CiVDS-mediated presynaptic glutamate release occurs through  
199 SNARE-dependent vesicular exocytosis.

200 We have shown that the N-type Ca<sup>2+</sup> channel Cav2.2 serves as a voltage sensor for  
201 CiVDS in the somata of DRG and superior cervical ganglion neurons, while the  
202 L-type Ca<sup>2+</sup> channel mediates CiVDS in adrenal slice chromaffin cells (Chai et al.,  
203 2017; Huang et al., 2019). To determine the voltage sensor for CiVDS in synaptic  
204 transmission of DRG-DH neurons, we blocked Cav2.2 with  $\omega$ -conotoxin-GVIA  
205 (GVIA, 1  $\mu$ M), which directly blocks the voltage-sensing ability of Cav2.2 (Chai et al.,

206 2017; Ellinor, Zhang, Horne, & Tsien, 1994; Yarotsky & Elmslie, 2009, 2010), and  
207 found that both CiVDS- and CDS-mediated EPSCs were remarkably decreased  
208 (*Figures 5D, Figure 5-figure supplement 1*). On the contrary, CiVDS-mediated  
209 EPSCs were insensitive to  $\text{Cd}^{2+}$ , a well-known pore blocker of VGCCs (Chow, 1991;  
210 Huang et al., 2019; Tang et al., 2014) (*Figure 5-figure supplement 2*), confirming that  
211 the gating charge but not pore permeability is crucial for CiVDS-EPSCs. To further  
212 confirm the essential role of Cav2.2 in CiVDS-EPSCs, we adopted an shRNA-based  
213 knockdown (KD) approach. As validated previously (Chai et al., 2017), two  
214 independent Cav2.2-targeting shRNAs (sh-1 and sh-2) were delivered into DRG  
215 neurons by the AAV2/5 virus before co-culture with DH neurons (*Figure 5E*). Both  
216 the CiVDS- and CDS-mediated EPSCs in DH neurons were substantially decreased  
217 by Cav2.2-KD in presynaptic DRG neurons compared with those in control group  
218 (*Figure 5F, Figure 5-figure supplement 3*). Together, these findings indicate that  
219 Cav2.2 serves as a voltage sensor for CiVDS-mediated glutamate release during the  
220 synaptic transmission from DRG to DH neurons.

221

## 222 **Discussion**

223 The classic view of neurotransmission is that impulse-induced presynaptic release  
224 (both somatic and terminal) occurs exclusively *via* CDS (Felmy et al., 2003; Geppert  
225 et al., 1994; Jackson & Chapman, 2006; Katz & Miledi, 1967; Meinrenken et al.,  
226 2003; Neher & Zucker, 1993; Sudhof, 2012). In somatic secretion, the CDS-only  
227 concept has recently been revised by a series of studies on CiVDS in peripheral

228 sensory and sympathetic neurons (Huang et al., 2019; Liu et al., 2011; Moya-Diaz et  
229 al., 2019; Sforza et al., 2019; C. Zhang et al., 2004; C. Zhang & Zhou, 2002; Zheng et  
230 al., 2009), including its functions and mechanisms (Chai et al., 2017). In the present  
231 study, we show that CiVDS contributes to synaptic transmission in the central nervous  
232 system: at synapses between presynaptic DRG terminals and postsynaptic central DH  
233 neurons. The CiVDS-mediated EPSCs have a faster recycling rate and less short-term  
234 depression than CDS-mediated EPSCs. Similar to somatic CiVDS, the machinery  
235 governing CiVDS-mediated synaptic transmission includes Cav2.2 (voltage sensor)  
236 and Syb2-SNARE (fusion pore) (**Figure 6**).

237 The major finding of the present work is that CiVDS contributes to the central  
238 synaptic transmission between co-cultured presynaptic DRG and postsynaptic DH  
239 neurons. This is supported by the following evidence: (1) EPSCs were recorded in  
240 DRG-DH (**Figure 1A,C**) but not hippocampal neurons (**Figure 1B**) in 0Ca solution;  
241 (2) field stimulation triggered a  $[Ca^{2+}]_i$  rise only in  $Ca^{2+}$ -containing solution (**Figures**  
242 **1A, Figure 1-figure supplement 1**); (3) in 2Ca solution, BAPTA reduced the EPSC  
243 amplitude to that in 0Ca (**Figure 1C-D**); (4) the evoked CiVDS-EPSCs were  
244 abolished by antagonists against AMPA receptors (CNQX) and NMDA receptors  
245 (AP5) (Trussell et al., 1993; C. Wang et al., 2016) (**Figure 3A-B**); (5) the decay of  
246 evoked CiVDS-EPSCs was greatly slowed by the AMPA receptor enhancer CTZ  
247 (Fucile et al., 2006) (**Figure 3C-D**); (6) Spy-pHluorin live-imaging confirmed CiVDS  
248 from the presynaptic terminals of DRG neurons but not hippocampal neurons (**Figure**  
249 **2, Figure 2-video 1-4**); (7) paired patch-clamp recordings revealed that EPSCs

250 between DRG-DH neurons were independent of extracellular and intracellular  $\text{Ca}^{2+}$ ,  
251 while the EPSCs in hippocampal neurons were completely blocked in the 0Ca  
252 condition (**Figure 4A-D**); (8) optogenetic stimulation of DRG neurons triggered  
253 EPSCs in either 0Ca or 2Ca solution, confirming that presynaptic glutamate release  
254 from DRG neurons is responsible for both the CiVDS-EPSCs and CDS-EPSCs  
255 recorded in DH neurons (**Figure 4E-G**); (9) SNARE is the CiVDS fusion machinery  
256 of the EPSCs, which were attenuated by knockout of the SNARE protein Syb2 in  
257 DRG neurons (**Figure 5A-C**); and (10) Cav2.2 is the voltage-sensor of  
258 CiVDS-EPSCs, as they were attenuated by either RNAi knockdown or an antagonist  
259 GVIA, which inhibits the voltage-sensor of Cav2.2 (Chai et al., 2017; Ellinor et al.,  
260 1994; Yarotsky & Elmslie, 2009, 2010), but were insensitive to open  $\text{Ca}^{2+}$  channel  
261 blocker  $\text{Cd}^{2+}$  (Chow, 1991; Huang et al., 2019; Tang et al., 2014) (**Figures 5D-F**,  
262 **Figure 5-figure supplement 2**). Together, CiVDS contributes to the EPSCs between  
263 DRG and DH neurons in physiological solution and in response to physiological  
264 stimulation.

265 The second finding is that both CiVDS and CDS make essential and  
266 complementary contributions to the total EPSC (CDS + CiVDS) of DRG-DH  
267 synaptic transmission under physiological conditions: 2 mM  $\text{Ca}^{2+}$  bath solution and  
268  $\leq 20$  Hz stimulation (Fang et al., 2005; Xu et al., 2000; Zheng et al., 2009). This is  
269 supported by the following evidence: (1) compared to the CDS-EPSC, the  
270 CiVDS-EPSC had a faster vesicle recycling rate (**Figure 1E-F**) and less short-term  
271 depression (**Figure 1G-H**); (2) CDS [EPSC(2Ca) – EPSC(0Ca)] and CiVDS

272 [EPSC(0Ca)] contributed similarly (~50% each) to the total EPSC during synaptic  
273 transmission following single-pulse/low-frequency stimulation ( $\leq 0.2$  Hz) (**Figure**  
274 **1D,F**); (3) CiVDS became dominant (~87%) in the total EPSC following “painful”  
275 high-frequency stimulation (10-20 Hz) (Fang et al., 2005; Xu et al., 2000; Zheng et al.,  
276 2009), as CDS was attenuated more than CiVDS in the total EPSC (**Figure 1G-I**) due  
277 to much slower vesicle recycling of the CDS-EPSC (Neher & Sakaba, 2008; L. Y.  
278 Wang, Neher, & Taschenberger, 2008; B. Zhang et al., 2011); (4) single-pulses or low  
279 frequency ( $\leq 0.2$  Hz) triggered both CDS and CiVDS in synaptic release (**Figure 1**),  
280 while only CiVDS (C. Zhang & Zhou, 2002; Zheng et al., 2009) but not CDS (Huang  
281 et al., 2019; Liu et al., 2011; Zheng et al., 2009) was triggered during somatic  
282 secretion; and (5) a “painful” burst of pulses (10-20 Hz) (Fang et al., 2005; Xu et al.,  
283 2000; Zheng et al., 2009) triggered both CiVDS and CDS in synaptic transmission  
284 (**Figure 1**), as well as somatic exocytosis (C. Zhang & Zhou, 2002; Zheng et al.,  
285 2009). Together, CiVDS and CDS make essential and complementary contributions to  
286 both synaptic EPSCs (**Figure 1**) and somatic transmitter release (Chai et al., 2017) in  
287 the DRG-DH sensory system.

288 The present study reported CiVDS-mediated synaptic transmission in a central  
289 synapse between DRG and DH neurons. In contrast, release from the presynaptic  
290 terminal of the calyx of Held is abolished after blocking  $Ca^{2+}$  influx (Felmy et al.,  
291 2003). Future work is needed to determine: (1) whether CiVDS-EPSCs occur in the  
292 synaptic transmission of other neural circuits; (2) whether CiVDS-IPSCs exist; (3)  
293 whether CiVDS-EPSCs occur in brain slices and *in vivo*; and (4) the physiological

294 relevance of CiVDS-EPSCs.

295 In summary, the present work extends the occurrence of CiVDS from peripheral  
296 neuronal somata and neuroendocrine cells to a central presynaptic terminal, and  
297 demonstrates CiVDS-EPSCs in a rat/mouse model of cultured DRG–DH neurons,  
298 implying potential physiological roles of CiVDS in synaptic transmission in other  
299 mammalian neural circuits.

300

## 301 **Materials and methods**

### 302 **Animals**

303 The use and care of animals was approved and directed by the Institutional Animal  
304 Care and Use Committee of Peking University and the Association for Assessment  
305 and Accreditation of Laboratory Animal Care. We used CRISPR/Cas9-mediated  
306 one-step genomic engineering to generate Synaptobrevin-2 floxed mice (Yang et al.,  
307 2013). A mixture of guide RNAs (CTCTGGTGATAGGCGGATCCAGG,  
308 AGGGTTCCTAGACGAACACCAGG), the corresponding donor DNA and the Cas9  
309 protein was micro-injected into the fertilized eggs, followed by embryonic  
310 transplantation. Two LoxP sites were inserted into the 5' intron of exon 3 and 3' intron  
311 of exon 4 in mouse synaptobrevin-2 gene donor fragment (Gene ID: 22318). All  
312 animals were housed in an animal facility under a 12-h light/dark cycle at  $22 \pm 2^\circ\text{C}$   
313 with food and water available *ad libitum*. Sprague-Dawley rats were used for all  
314 experiments except that floxed Syb2-null mice were used for Syb2-KO experiments.

### 315 **Cell culture**

316 Three to four-day old postnatal Sprague-Dawley rats or floxed Syb2-null mice were  
317 used for the culture of dorsal root ganglion (DRG) neurons and 15–16 day embryos of  
318 Sprague-Dawley rats were used for the culture of dorsal horn (DH) neurons. Postnatal  
319 day 0 Sprague-Dawley rats were used for the culture of hippocampal neurons.

320 DRG isolation and neuronal culture were performed as previously described (Chai  
321 et al., 2017). DRG ganglia were dissected from the spine and placed in cold L15  
322 medium (Gibco). After removing attached tissue, the ganglia were cut into several  
323 pieces and incubated in Dulbecco's modified Eagle's medium (DMEM)/F12 (Gibco)  
324 containing trypsin (0.2- 0.3 mg/ml) and collagenase (1 mg/ml) for 40 min at 37°C  
325 under 5% CO<sub>2</sub>. After that, the pieces were washed twice with 2 ml DMEM/F12 and  
326 dissociated into single cells by 8–10 bouts of trituration. For confocal imaging, cells  
327 were collected and transfected with Synaptophysin (Spy)-pHluorin plasmid (a kind  
328 gift from Dr. G. Miesenböck, University of Oxford) by using the Neon<sup>TM</sup> (100- $\mu$ l)  
329 electroporation system (MPK10096, Invitrogen). Then the cell suspension was placed  
330 on 0.1% poly-L-lysine pretreated coverslips and maintained in Neurobasal  
331 supplemented with 2% B27 and 0.5 mM L-glutamine (all from Gibco).

332 DH neurons were isolated and cultured as previously described (Zheng et al., 2009).  
333 The spinal cord was dissected from 15–16-day embryos and placed in cold D-Hanks  
334 solution. After removing attached tissue, the dorsal spinal cord was incubated in 0.25%  
335 trypsin solution for 15 min at 37°C under 5% CO<sub>2</sub>. After that, the dorsal cord was  
336 washed twice with 2 ml Neurobasal supplemented with 2% B27 and 0.5 mM  
337 L-glutamine (all from Gibco) and dissociated into single cells by 8–10 bouts of

338 trituration. To co-culture DRG and DH neurons, the suspension of DH neurons was  
339 evenly placed onto pre-cultured DRG neurons. All cells were maintained in  
340 Neurobasal supplemented with 2% B27, 0.5 mM L-glutamine (all from Gibco), 10  
341 ng/ml nerve growth factor (NGF), 50 ng/ml brain-derived neurotrophic factor (BDNF),  
342 50 ng/ml glial cell line-derived neurotrophic factor (GDNF), and 5  $\mu$ M cytosine  
343 arabinoside. The mixture of NGF, BDNF, and GDNF helped to maintain CiVDS  
344 for >2 weeks. The neurons were used between days 10-12 after the start of co-culture.

345 For hippocampal cultures, hippocampal neurons were prepared as previously  
346 described (C. Wang et al., 2018). Briefly, hippocampi were dissected from neonatal  
347 rats and placed in cold D-Hanks solution. After removing attached tissue, the  
348 hippocampi were digested in 0.25 % trypsin for 15 min at 37°C under 5% CO<sub>2</sub>. After  
349 that, the tissue was washed twice with 2 ml Neurobasal supplemented with 2% B27  
350 and 0.5 mM L-glutamine (all from Gibco), and dissociated by 8–10 bouts of  
351 trituration. Then the cells were placed on 0.1% poly-L-lysine-coated coverslips and  
352 maintained in DMEM (Gibco) supplemented with 10% FBS for 3 h, which was then  
353 replaced by Neurobasal supplemented with 2% B27 and 0.5 mM L-glutamine.  
354 Experiments were performed between days 14-16 after the start of culture. For  
355 confocal imaging, cultures at day 5 were transfected with Spy-pHluorin plasmid by  
356 using a calcium-phosphate transfection method. Briefly, plasmids in a 250 mM CaCl<sub>2</sub>  
357 solution were slowly added to Hank's balanced salt solution (HBSS) and incubated at  
358 room temperature for 25 min. The mixture was then added to the culture and  
359 incubated for 15 min. The cells were washed with MgCl<sub>2</sub>-containing medium and then



360 maintained in the original medium. Confocal imaging was performed at day 13-14.

### 361 **Virus infection**

362 For virus infection, the virus was added to the culture solution at the beginning of  
363 DRG neuronal culture. After 3 days, the virus-containing culture medium was fully  
364 replaced and then the DH neurons were co-cultured with the DRG neurons. The  
365 adeno-associated virus vector carrying CAG-hChR2(H134R)-mCherry (AAV2/9) was  
366 used for optogenetics and CAG-EGFP-2A-Cre (AAV2/5) for Syb2-knockout. For  
367 Cav2.2 knockdown, the nucleotide target sequences GG ACA TTT CTG CAA GCC  
368 TTA A (shCav2.2-1) and GC TAC TTC CGG TCT TCC TTC A (shCav2.2-2) were  
369 integrated into adeno-associated virus (AAV2/5) to silence the expression of Cav2.2.  
370 All the viruses were from Shanghai Heyuan Biotech (China).

### 371 **Electrophysiology**

372 Excitatory postsynaptic currents (EPSCs) were recorded under the whole-cell  
373 configuration using an EPC10/2 amplifier controlled by Patchmaster software (HEKA  
374 Elektronik) as described previously (B. Zhang et al., 2011; Zheng et al., 2009). The  
375 membrane potential was clamped at  $-70$  mV, and pipette resistance was controlled to  
376  $\sim 10$  M $\Omega$  for EPSC recordings. The standard external bath solution contained (in mM):  
377 150 NaCl, 5 KCl, 2.5 CaCl<sub>2</sub>, 1 MgCl<sub>2</sub>, 10 H-HEPES, and 10 D-glucose, pH 7.4. The  
378 Ca<sup>2+</sup>-free solution for CiVDS recording was the same, except that 2.5 mM Ca<sup>2+</sup> was  
379 replaced by 1 mM EGTA. For EPSC recording, 100  $\mu$ M picrotoxin was added to the  
380 bath to block IPSCs (inhibitory postsynaptic currents). The standard intracellular  
381 pipette solution contained (in mM): 145 K-gluconate, 5 KCl, 4 MgCl<sub>2</sub>·6H<sub>2</sub>O, 10

382 H-HEPES, 5 EGTA, and 2 QX314, pH 7.2. Standard intracellular solution with CsCl  
383 containing (in mM) 153 CsCl, 1 MgCl<sub>2</sub>, 10 H-HEPES, 4 Mg-ATP, 5 QX314, pH7.2  
384 was used for a stable recording in Syb2-KO and optogenetic experiments. For EPSC  
385 recordings, local electrical field or light stimulation was applied. Field electrical  
386 stimulation (Estim) was used to evoke action potentials *via* a laboratory-made bipolar  
387 microelectrode (150 μm in diameter) connected to an electronic stimulator (Nihon  
388 Kohden, SEN-3201) (B. Zhang et al., 2011).

389 In paired patch-clamp recordings, the presynaptic DRG neuron was in whole-cell  
390 current-clamp mode and the postsynaptic dorsal horn neuron was in whole-cell  
391 voltage-clamp mode. For the current-clamp of DRG neurons, the intracellular solution  
392 contained (in mM) 135 K-gluconate (115 when adding 10 mM BAPTA), 5 KCl, 4  
393 MgCl<sub>2</sub>, 3 MgATP, 0.3 Na<sub>2</sub>GTP, and 10 Na<sub>2</sub>-phosphocreatine, 10 HEPES, pH 7.2. For  
394 the voltage-clamp DH neuron, standard intracellular solution (but CsCl replacing KCl)  
395 was used. For light stimulation, 475-nm light was generated by a laser (VD-III A,  
396 Beijing Viasho Technology, China).

397 All recordings were made at room temperature (25°C). Igor software (Wavemetrics,  
398 Lake Oswego, OR) was used for all offline data analysis. Series conductance and  
399 membrane conductance were used to monitor the seal condition during patch-clamp  
400 recordings.

#### 401 **Ca<sup>2+</sup> imaging**

402 Ca<sup>2+</sup> imaging was conducted as described previously (Huang et al., 2019; Shang et al.,  
403 2016). Cytosolic Ca<sup>2+</sup> was measured with the Ca<sup>2+</sup> indicator Cal-520 (21130, AAT

404 Bioquest). Co-cultured DRG and DH neurons were loaded with 0.5  $\mu\text{M}$  Cal-520 AM  
405 for 30 min at 37°C and then washed 3 times with 2 mM  $\text{Ca}^{2+}$  solution at room  
406 temperature. Then the cells were electrically simulated and imaged on an inverted  
407 confocal microscope (LSM710, Zeiss). The fluorescent signal was captured by  
408 excitation with a 488-nm laser and emission at 500–560 nm. Fluorescence intensity  
409 values from the images were calculated and analyzed using ImageJ. The cutoff for  
410 selection (5 a.u.) was 1.5-fold that of the full-width at half-maximum of the Gaussian  
411 distribution of fluorescence noise.

#### 412 **Confocal live-imaging**

413 Time-lapse images were captured at 0.5 s interval through the inverted confocal  
414 microscope (LSM710, Zeiss) with a 63 x oil-immersion objective lens (Zeiss). The  
415 fluorescent signal was captured by excitation with a 488-nm laser and emission at  
416 500–560 nm at room temperature bathed in  $\text{Ca}^{2+}$ -free or standard external solution.  
417 Electrical field stimulation was applied via an electrical stimulator (Nihon Kohden,  
418 SEN-3201). Fluorescence changes at individual boutons were monitored over time  
419 and calculated as  $\Delta F/F_0$ . Images were acquired for more than 200 s in total. The first  
420 30 s before stimulation was used to establish a baseline. Data were analyzed offline  
421 with ImageJ.

#### 422 **Protein preparation and western blotting**

423 Cells were washed with phosphate-balanced saline (PBS) and homogenized on ice  
424 with lysate buffer (RIPA; C1503, Beijing Applygen Technologies Inc.), 1 mM PMSF,  
425 and 2% proteinase inhibitor (539,134; Calbiochem). The homogenates were

426 centrifuged at 13,000 rpm for 10 min at 4°C and the supernatants were collected and  
427 boiled in SDS-PAGE buffer. Proteins were electrophoresed and transferred to  
428 nitrocellulose filter membranes (Pall Life Sciences). The membranes were blocked for  
429 1 h with PBS containing 0.1% Tween-20 (v/v) and 5% fat-free milk (w/v), then  
430 incubated with primary antibodies at 4°C overnight in PBST containing 2% bovine  
431 serum albumin. After washing with 0.1% Tween-20 containing PBS (PBST), they  
432 were then incubated with secondary antibodies at room temperature for 1 h. Blots  
433 were scanned with an Odyssey infrared imaging system (LI-COR Biosciences) and  
434 quantified with ImageJ (National Institutes of Health, Bethesda, MD). The primary  
435 antibodies used were anti-Syb2 (104202, SYSY) and  $\beta$ -actin (A5316, Sigma). The  
436 secondary antibodies were IRDye 800CW goat anti-rabbit IgG (LIC-926-32211) and  
437 IRDye 680CW goat anti-mouse IgG (LIC-926-32220), both from LI-COR  
438 Biosciences.

#### 439 **Statistical analysis**

440 All experiments were performed with controls side-by-side and in random order, and  
441 were replicated at least three times. All data were collected at least every 2 weeks  
442 within 3 months window to maintain the stability of a data set. Sample sizes are  
443 consistent with those reported in similar studies. Multiple recordings from one cell  
444 with the identical stimulus protocol were considered as technical replications, which  
445 were averaged to generate a single biological replication representing value/data from  
446 one cell. No samples or recordings that provided successful measurements were  
447 excluded from analysis. Data are shown as the mean  $\pm$  s.e.m. All the data were tested

448 for normality by Shapiro-Wilk test before the statistical analysis. If the data passed the  
449 normality test, two-tailed Student's *t* test was applied for comparison between two  
450 unpaired groups and the paired Student's *t* test was used for comparison between two  
451 matched groups. If the data did not pass normality, Mann-Whitney test was applied  
452 for comparison between two unpaired groups, Wilcoxon matched-pairs signed rank  
453 test (Wilcoxon test) was applied for two matched groups and the Kruskal-Wallis test  
454 followed by Dunn's multiple comparisons test was used when multiple groups were  
455 compared with one variable. All tests were conducted using Prism V7.0 (GraphPad  
456 Software, Inc.) and SPSS 20.0 (Statistical Package for the Social Sciences).  
457 Significant differences were accepted at  $p < 0.05$ .

#### 458 **Acknowledgements**

459 We thank Drs. Mengping Wei and Chen Zhang (Capital Medical University) for  
460 advices on EPSC recordings and virus transfection *in vivo*, Jianguo Gu (UA  
461 Birmingham), Kun Yang (Jiangsu University) and Luyang Wang (Toronto University)  
462 for helpful discussions, and Iain C. Bruce (Peking University) for reading the  
463 manuscript. This work was supported by National Natural Science Foundation of  
464 China (31930061, 21790394, 31761133016, 31821091, 31330024, 31171026,  
465 31327901, 32171233, 31670843 and 21790390), the National Key Research and  
466 Development Program of China (2016YFA0500401), the Shaanxi Natural Science  
467 Funds for Distinguished Young Scholars of China (2019JC-07), the Innovation  
468 Capability Support Program of Shaanxi Province, China (2021TD-37), and the China  
469 Postdoctoral Science Foundation (2020M680211, 2021T140014).

470

#### 471 **Additional information**

472 **Funding**

| <b>Funder</b>                                   | <b>Grant reference number</b> | <b>Author</b> |
|-------------------------------------------------|-------------------------------|---------------|
| National Natural Science<br>Foundation of China | 31930061                      | Zhuan Zhou    |
| National Natural Science<br>Foundation of China | 21790394                      | Zhuan Zhou    |
| National Natural Science<br>Foundation of China | 31761133016                   | Zhuan Zhou    |
| National Natural Science<br>Foundation of China | 31821091                      | Zhuan Zhou    |
| National Natural Science<br>Foundation of China | 31330024                      | Zhuan Zhou    |
| National Natural Science<br>Foundation of China | 31171026                      | Zhuan Zhou    |
| National Natural Science<br>Foundation of China | 31327901                      | Zhuan Zhou    |
| National Natural Science<br>Foundation of China | 32171233                      | Changhe Wang  |
| National Natural Science<br>Foundation of China | 31670843                      | Changhe Wang  |
| National Natural Science<br>Foundation of China | 21790390                      | Zhuan Zhou    |

|                                                                                                                                  |                |              |
|----------------------------------------------------------------------------------------------------------------------------------|----------------|--------------|
| National Key Research and Development Program of China                                                                           | 2016YFA0500401 | Zhuan Zhou   |
| Shaanxi Natural Science Funds for Distinguished Young Scholars of China                                                          | 2019JC-07      | Changhe Wang |
| Innovation Capability Support Program of Shaanxi Province, China                                                                 | 2021TD-37      | Changhe Wang |
| China Postdoctoral Science Foundation                                                                                            | 2020M680211    | Rong Huang   |
| China Postdoctoral Science Foundation                                                                                            | 2021T140014    | Rong Huang   |
| The funders had no role in study design, data collection and interpretation, or the decision to submit the work for publication. |                |              |

473

474 **Author contributions**

475 Y.W., R.H., X.D. and Y.H. performed and analyzed the experiments with the help of

476 Y.X., J.L., X.J., X.W., Z.Q., Y.L., B.L. and F.Z.; Y.Z. and P.C. generated floxed

477 Syb2-null mice; Z.Z., Z.C. and C.W. designed the work and wrote the manuscript with

478 inputs from all authors. Z.Z. supervised the project.

479

480 **References**

- 481 Artalejo, C. R., Elhamdani, A., & Palfrey, H. C. (2002). Sustained stimulation shifts the  
482 mechanism of endocytosis from dynamin-1-dependent rapid endocytosis to clathrin-  
483 and dynamin-2-mediated slow endocytosis in chromaffin cells. *Proc Natl Acad Sci U S*  
484 *A*, *99*(9), 6358-6363. doi: 10.1073/pnas.082658499
- 485 Augustine, G. J., Charlton, M. P., & Smith, S. J. (1987). Calcium action in synaptic transmitter  
486 release. *Annu Rev Neurosci*, *10*, 633-693. doi:  
487 10.1146/annurev.ne.10.030187.003221
- 488 Chai, Z., Wang, C., Huang, R., Wang, Y., Zhang, X., Wu, Q., . . . Zhou, Z. (2017). Cav2.2 gates  
489 calcium-independent but voltage-dependent secretion in mammalian sensory neurons.  
490 *Neuron*, *96*(6), 1317-1326 e1314. doi: 10.1016/j.neuron.2017.10.028
- 491 Chow, R. H. (1991). Cadmium block of squid calcium currents. Macroscopic data and a kinetic  
492 model. *J Gen Physiol*, *98*(4), 751-770. doi: 10.1085/jgp.98.4.751
- 493 Ellinor, P. T., Zhang, J. F., Horne, W. A., & Tsien, R. W. (1994). Structural determinants of the  
494 blockade of n-type calcium channels by a peptide neurotoxin. *Nature*, *372*(6503),  
495 272-275. doi: 10.1038/372272a0
- 496 Fang, X., McMullan, S., Lawson, S. N., & Djouhri, L. (2005). Electrophysiological differences  
497 between nociceptive and non-nociceptive dorsal root ganglion neurones in the rat in  
498 vivo. *J Physiol*, *565*(Pt 3), 927-943. doi: 10.1113/jphysiol.2005.086199
- 499 Felmy, F., Neher, E., & Schneggenburger, R. (2003). The timing of phasic transmitter release  
500 is ca<sup>2+</sup>-dependent and lacks a direct influence of presynaptic membrane potential.  
501 *Proc Natl Acad Sci U S A*, *100*(25), 15200-15205. doi:



- 502           10.1073/pnas.24332761002433276100 [pii]
- 503 Ferguson, S. M., Brasnjo, G., Hayashi, M., Wolfel, M., Collesi, C., Giovedi, S., . . . De Camilli,  
504 P. (2007). A selective activity-dependent requirement for dynamin 1 in synaptic vesicle  
505 endocytosis. *Science*, *316*(5824), 570-574. doi: 10.1126/science.1140621
- 506 Fucile, S., Miledi, R., & Eusebi, F. (2006). Effects of cyclothiazide on glur1/ampa receptors.  
507 *Proc Natl Acad Sci U S A*, *103*(8), 2943-2947. doi: 0511063103  
508 [pii]10.1073/pnas.0511063103
- 509 Geppert, M., Goda, Y., Hammer, R. E., Li, C., Rosahl, T. W., Stevens, C. F., & Sudhof, T. C.  
510 (1994). Synaptotagmin i: A major ca<sup>2+</sup> sensor for transmitter release at a central  
511 synapse. *Cell*, *79*(4), 717-727. doi: 10.1016/0092-8674(94)90556-8
- 512 Hopfield, J. J. (1995). Pattern recognition computation using action potential timing for  
513 stimulus representation. *Nature*, *376*(6535), 33-36. doi: 10.1038/376033a0
- 514 Huang, R., Wang, Y., Li, J., Jiang, X., Li, Y., Liu, B., . . . Zhou, Z. (2019). Ca(2+)-independent  
515 but voltage-dependent quantal catecholamine secretion (civds) in the mammalian  
516 sympathetic nervous system. *Proc Natl Acad Sci U S A*. doi: 201902444  
517 [pii]10.1073/pnas.19024441161902444116 [pii]
- 518 Jackson, M. B., & Chapman, E. R. (2006). Fusion pores and fusion machines in ca<sup>2+</sup>-triggered  
519 exocytosis. *Annu Rev Biophys Biomol Struct*, *35*, 135-160. doi:  
520 10.1146/annurev.biophys.35.040405.101958
- 521 Jahn, R., & Scheller, R. H. (2006). Snares--engines for membrane fusion. *Nat Rev Mol Cell*  
522 *Biol*, *7*(9), 631-643. doi: 10.1038/nrm2002
- 523 Katz, B., & Miledi, R. (1967). Ionic requirements of synaptic transmitter release. *Nature*,

- 524           215(5101), 651. doi: 10.1038/215651a0
- 525   Liu, T., Shang, S. J., Liu, B., Wang, C. H., Wang, Y. S., Xiong, W., . . . Zhou, Z. (2011). Two  
526           distinct vesicle pools for depolarization-induced exocytosis in somata of dorsal root  
527           ganglion neurons. *J Physiol*, 589(Pt 14), 3507-3515. doi:  
528           10.1113/jphysiol.2011.208777
- 529   Meinrenken, C. J., Borst, J. G., & Sakmann, B. (2003). Local routes revisited: The space and  
530           time dependence of the ca<sup>2+</sup> signal for phasic transmitter release at the rat calyx of  
531           held. *J Physiol*, 547(Pt 3), 665-689. doi: 10.1113/jphysiol.2002.0327142002.032714  
532           [pii]
- 533   Moya-Diaz, J., Bayones, L., Montenegro, M., Cardenas, A. M., Koch, H., Doi, A., & Marengo, F.  
534           D. (2019). Ca<sup>2+</sup> -independent and voltage-dependent exocytosis in mouse  
535           chromaffin cells. *Acta Physiol (Oxf)*, e13417. doi: 10.1111/apha.13417
- 536   Nanou, E., & Catterall, W. A. (2018). Calcium channels, synaptic plasticity, and  
537           neuropsychiatric disease. *Neuron*, 98(3), 466-481. doi: 10.1016/j.neuron.2018.03.017
- 538   Neher, E., & Sakaba, T. (2008). Multiple roles of calcium ions in the regulation of  
539           neurotransmitter release. *Neuron*, 59(6), 861-872. doi: 10.1016/j.neuron.2008.08.019
- 540   Neher, E., & Zucker, R. S. (1993). Multiple calcium-dependent processes related to secretion  
541           in bovine chromaffin cells. *Neuron*, 10(1), 21-30. doi: Doi  
542           10.1016/0896-6273(93)90238-M
- 543   Parnas, I., & Parnas, H. (2010). Control of neurotransmitter release: From ca<sup>2+</sup> to voltage  
544           dependent g-protein coupled receptors. *Pflugers Arch*, 460(6), 975-990. doi:  
545           10.1007/s00424-010-0872-7

- 546 Sabatini, B. L., & Regehr, W. G. (1996). Timing of neurotransmission at fast synapses in the  
547 mammalian brain. *Nature*, *384*(6605), 170-172. doi: 10.1038/384170a0
- 548 Sforza, L., Franciolini, F., & Catacuzzeno, L. (2019). Ca<sup>2+</sup>-dependent and Ca<sup>2+</sup>-  
549 -independent somatic release from trigeminal neurons. *J Cell Physiol*, *234*(7),  
550 10977-10989. doi: 10.1002/jcp.27901
- 551 Shang, S., Zhu, F., Liu, B., Chai, Z., Wu, Q., Hu, M., . . . Zhou, Z. (2016). Intracellular trpa1  
552 mediates Ca<sup>2+</sup> release from lysosomes in dorsal root ganglion neurons. *J Cell Biol*,  
553 *215*(3), 369-381. doi: 10.1083/jcb.201603081
- 554 Sollner, T., Whiteheart, S. W., Brunner, M., Erdjument-Bromage, H., Geromanos, S., Tempst,  
555 P., & Rothman, J. E. (1993). Snap receptors implicated in vesicle targeting and fusion.  
556 *Nature*, *362*(6418), 318-324. doi: 10.1038/362318a0
- 557 Sudhof, T. C. (2012). Calcium control of neurotransmitter release. *Cold Spring Harb Perspect*  
558 *Biol*, *4*(1), a011353. doi: 10.1101/cshperspect.a011353a011353  
559 [pii]cshperspect.a011353 [pii]
- 560 Tang, L., Gamal El-Din, T. M., Payandeh, J., Martinez, G. Q., Heard, T. M., Scheuer, T., . . .  
561 Catterall, W. A. (2014). Structural basis for Ca<sup>2+</sup> selectivity of a voltage-gated calcium  
562 channel. *Nature*, *505*(7481), 56-61. doi: 10.1038/nature12775
- 563 Trussell, L. O., Zhang, S., & Raman, I. M. (1993). Desensitization of ampa receptors upon  
564 multiquantal neurotransmitter release. *Neuron*, *10*(6), 1185-1196. doi:  
565 10.1016/0896-6273(93)90066-z
- 566 Wang, C., Kang, X., Zhou, L., Chai, Z., Wu, Q., Huang, R., . . . Zhou, Z. (2018).  
567 Synaptotagmin-11 is a critical mediator of parkin-linked neurotoxicity and parkinson's

- 568 disease-like pathology. *Nat Commun*, *9*(1), 81. doi: 10.1038/s41467-017-02593-y
- 569 Wang, C., Wang, Y., Hu, M., Chai, Z., Wu, Q., Huang, R., . . . Zhou, Z. (2016).  
570 Synaptotagmin-11 inhibits clathrin-mediated and bulk endocytosis. *EMBO Rep*, *17*(1),  
571 47-63. doi: 10.15252/embr.201540689
- 572 Wang, L. Y., Neher, E., & Taschenberger, H. (2008). Synaptic vesicles in mature calyx of held  
573 synapses sense higher nanodomain calcium concentrations during action  
574 potential-evoked glutamate release. *J Neurosci*, *28*(53), 14450-14458. doi:  
575 10.1523/JNEUROSCI.4245-08.200828/53/14450 [pii]
- 576 Wu, Q., Zhang, Q., Liu, B., Li, Y., Wu, X., Kuo, S., . . . Zhou, Z. (2019). Dynamin 1 restrains  
577 vesicular release to a subquantal mode in mammalian adrenal chromaffin cells. *J*  
578 *Neurosci*, *39*(2), 199-211. doi: 10.1523/JNEUROSCI.1255-18.2018
- 579 Xu, G. Y., Huang, L. Y., & Zhao, Z. Q. (2000). Activation of silent mechanoreceptive cat c and  
580 adelta sensory neurons and their substance p expression following peripheral  
581 inflammation. *J Physiol*, *528 Pt 2*, 339-348. doi: 10.1111/j.1469-7793.2000.00339.x
- 582 Yang, H., Wang, H., Shivalila, C. S., Cheng, A. W., Shi, L., & Jaenisch, R. (2013). One-step  
583 generation of mice carrying reporter and conditional alleles by crispr/cas-mediated  
584 genome engineering. *Cell*, *154*(6), 1370-1379. doi: 10.1016/j.cell.2013.08.022
- 585 Yarotskyy, V., & Elmslie, K. S. (2009). Omega-conotoxin gvia alters gating charge movement  
586 of n-type (cav2.2) calcium channels. *J Neurophysiol*, *101*(1), 332-340. doi:  
587 10.1152/jn.91064.2008
- 588 Yarotskyy, V., & Elmslie, K. S. (2010). Interference between two modulators of n-type (cav2.2)  
589 calcium channel gating demonstrates that omega-conotoxin gvia disrupts open state

590 gating. *Biochim Biophys Acta*, 1798(9), 1821-1828. doi:  
591 10.1016/j.bbamem.2010.05.004

592 Zhang, B., Sun, L., Yang, Y. M., Huang, H. P., Zhu, F. P., Wang, L., . . . Zhou, Z. (2011). Action  
593 potential bursts enhance transmitter release at a giant central synapse. *J Physiol*,  
594 589(Pt 9), 2213-2227. doi: 10.1113/jphysiol.2010.200154jphysiol.2010.200154 [pii]

595 Zhang, C., Xiong, W., Zheng, H., Wang, L., Lu, B., & Zhou, Z. (2004). Calcium- and  
596 dynamin-independent endocytosis in dorsal root ganglion neurons. *Neuron*, 42(2),  
597 225-236. doi: 10.1016/s0896-6273(04)00189-8

598 Zhang, C., & Zhou, Z. (2002). Ca(2+)-independent but voltage-dependent secretion in  
599 mammalian dorsal root ganglion neurons. *Nat Neurosci*, 5(5), 425-430. doi:  
600 10.1038/nn845

601 Zheng, H., Fan, J., Xiong, W., Zhang, C., Wang, X. B., Liu, T., . . . Zhou, Z. (2009). Action  
602 potential modulates ca<sup>2+</sup>-dependent and ca<sup>2+</sup>-independent secretion in a sensory  
603 neuron. *Biophys J*, 96(6), 2449-2456. doi:  
604 10.1016/j.neuron.2017.10.02810.1016/j.bpj.2008.11.037

605

606

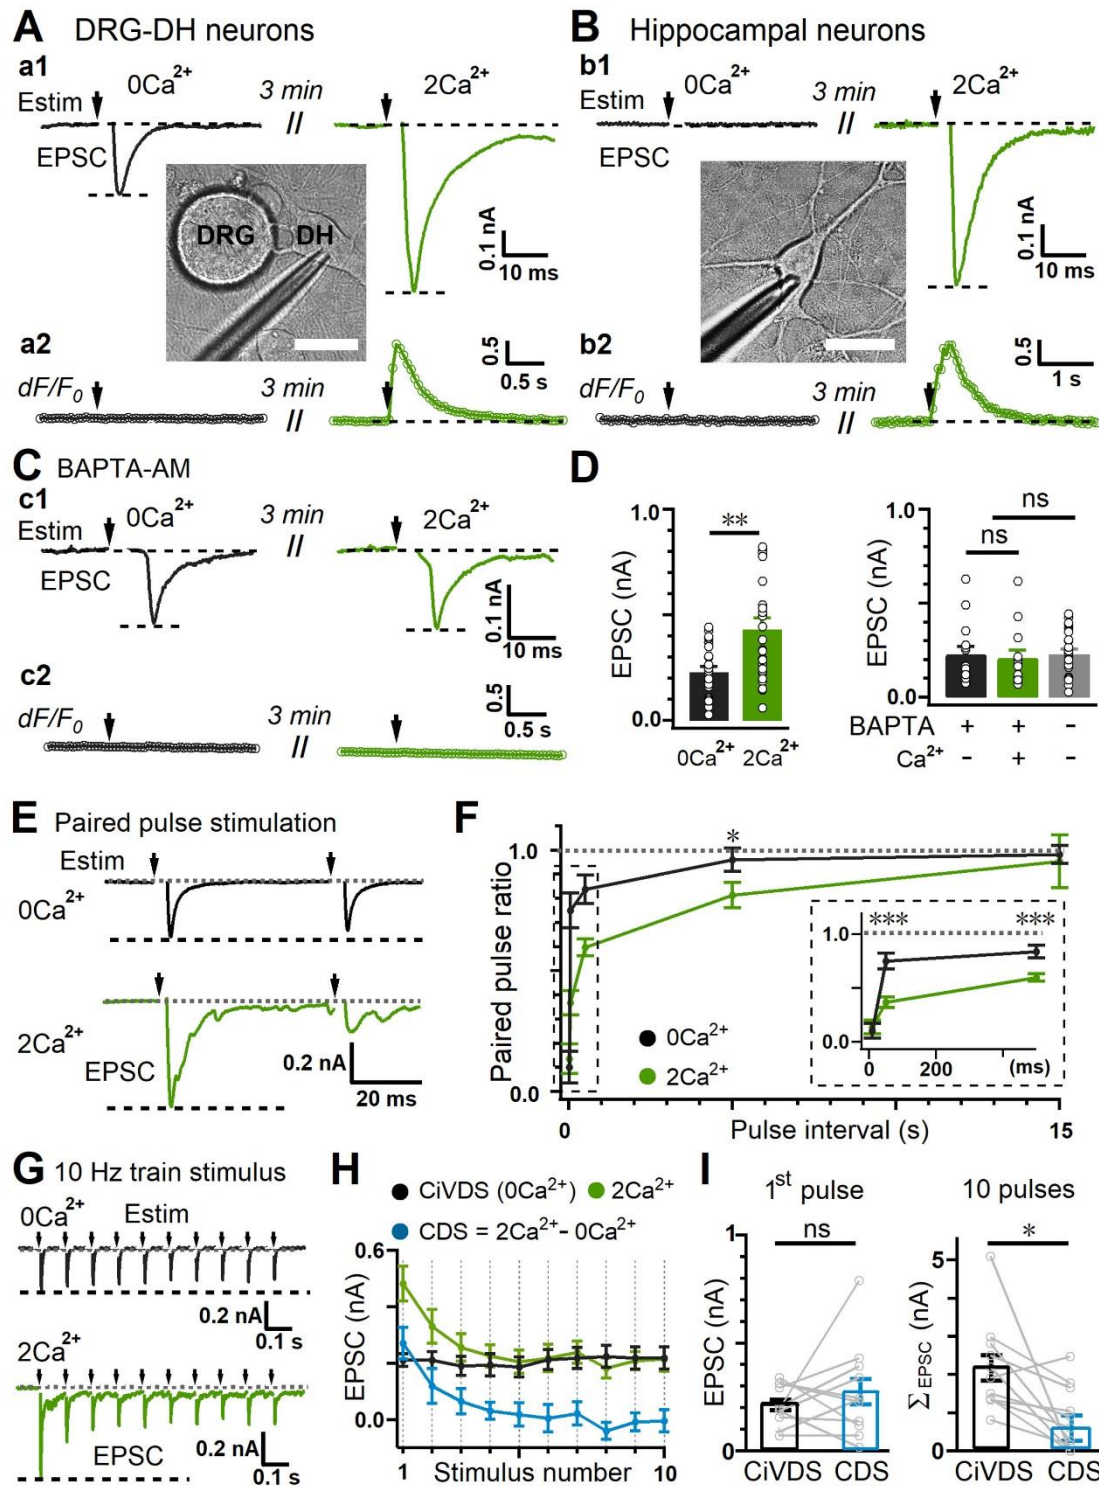

607 **Figure 1.**  $Ca^{2+}$ -independent but voltage-dependent synaptic neurotransmission in  
 608 co-cultured DRG-DH neurons. (A) (a1) Whole-cell current recording of evoked EPSC  
 609 signals in response to local electrical field stimulation (Estim, arrows) from a  
 610 postsynaptic dorsal horn (DH) neuron co-cultured with presynaptic dorsal root

611 ganglion (DRG) neurons in  $\text{Ca}^{2+}$ -free ( $0\text{Ca}^{2+}$ , black) and 2 mM  $\text{Ca}^{2+}$  bath ( $2\text{Ca}^{2+}$ ,  
612 green); (a2), evoked intracellular  $\text{Ca}^{2+}$  signals ( $dF/F_0$ ) in a DRG neuron; inset,  
613 micrograph showing the setup for EPSC recording from co-cultured DRG-DH  
614 neurons (scale bar, 20  $\mu\text{m}$ ). (B) (b1) Evoked EPSCs from cultured hippocampal  
615 neurons in  $\text{Ca}^{2+}$ -free (black) and 2 mM  $\text{Ca}^{2+}$ -containing solution (green); (b2) evoked  
616 intracellular  $\text{Ca}^{2+}$  signals ( $dF/F_0$ ) in hippocampal neurons; inset, micrograph showing  
617 the setup for EPSC recordings from a hippocampal neuron (scale bar, 20  $\mu\text{m}$ ). (C) As  
618 in (A), except that 50  $\mu\text{M}$  BAPTA-AM was pre-loaded into the DRG and DH neurons  
619 before recording in  $\text{Ca}^{2+}$ -free (black) or 2 mM  $\text{Ca}^{2+}$ -containing solution (green). (D)  
620 Left, quantification of amplitude as in (A) ( $n = 26$  cells for  $0\text{Ca}^{2+}$  and 29 cells for  
621  $2\text{Ca}^{2+}$ ). Right, quantification of EPSC amplitudes as in (C) ( $n = 16$  cells for  $0\text{Ca}^{2+}$  and  
622 14 cells for  $2\text{Ca}^{2+}$ ). (E) Evoked CiVDS-EPSCs ( $0\text{Ca}^{2+}$ , black) and total EPSCs (CDS  
623 + CiVDS,  $2\text{Ca}^{2+}$ , green) induced by paired-pulse stimulation with a 50-ms interval  
624 from DH neurons co-cultured with DRG neurons. The  $0\text{Ca}^{2+}$  and  $2\text{Ca}^{2+}$  EPSCs were  
625 recorded in 2 different DH neurons. (F) Summary plot of paired-pulse ratios as in (E)  
626 with different intervals (in  $0\text{Ca}^{2+}$ ,  $n = 7$  cells for 10 ms, 13 for 50 ms, 14 for 500 ms,  
627 10 for 5 s, and 8 for 15 s; in  $2\text{Ca}^{2+}$ ,  $n = 14$  cells for 10 ms, 17 for 50 ms, 22 for 500 ms,  
628 19 for 5 s, and 14 for 15 s). Inset shows the initial plot at an expanded scale. (G)  
629 Representative EPSCs induced by a 10-Hz stimulus train in DH neurons co-cultured  
630 with DRG neurons in  $\text{Ca}^{2+}$ -free (black) or 2 mM  $\text{Ca}^{2+}$ -containing solution (green).  
631 The  $0\text{Ca}^{2+}$  and  $2\text{Ca}^{2+}$  EPSCs were recorded in 2 different DH neurons. (H) Summary  
632 plots of the EPSC amplitudes as in (G), including CiVDS ( $0\text{Ca}^{2+}$ , black), CDS +

633 CiVDS ( $2\text{Ca}^{2+}$ , green), and CDS ( $2\text{Ca}^{2+} - 0\text{Ca}^{2+}$ , blue) ( $n = 11$  cells). (I) As in (H),  
634 statistics for amplitudes of CiVDS-EPSC ( $0\text{Ca}^{2+}$ , black) and CDS-EPSC (“ $2\text{Ca}^{2+}$ ” –  
635 “ $0\text{Ca}^{2+}$ ”, blue) evoked by single-pulse (first EPSC, left) or 10 pulses (cumulative 10  
636 EPSCs,  $\Sigma_{\text{EPSC}}$ , right) during 10-Hz train stimulation ( $n = 11$  cells). All but (B) were  
637 from DRG and DH co-cultures. Data are shown as the mean  $\pm$  s.e.m.; Mann-Whitney  
638 test for D and F; paired Student’s  $t$  test for I; \* $p < 0.05$ , \*\* $p < 0.01$ , \*\*\* $p < 0.001$ , ns,  
639 not significant.

640

641



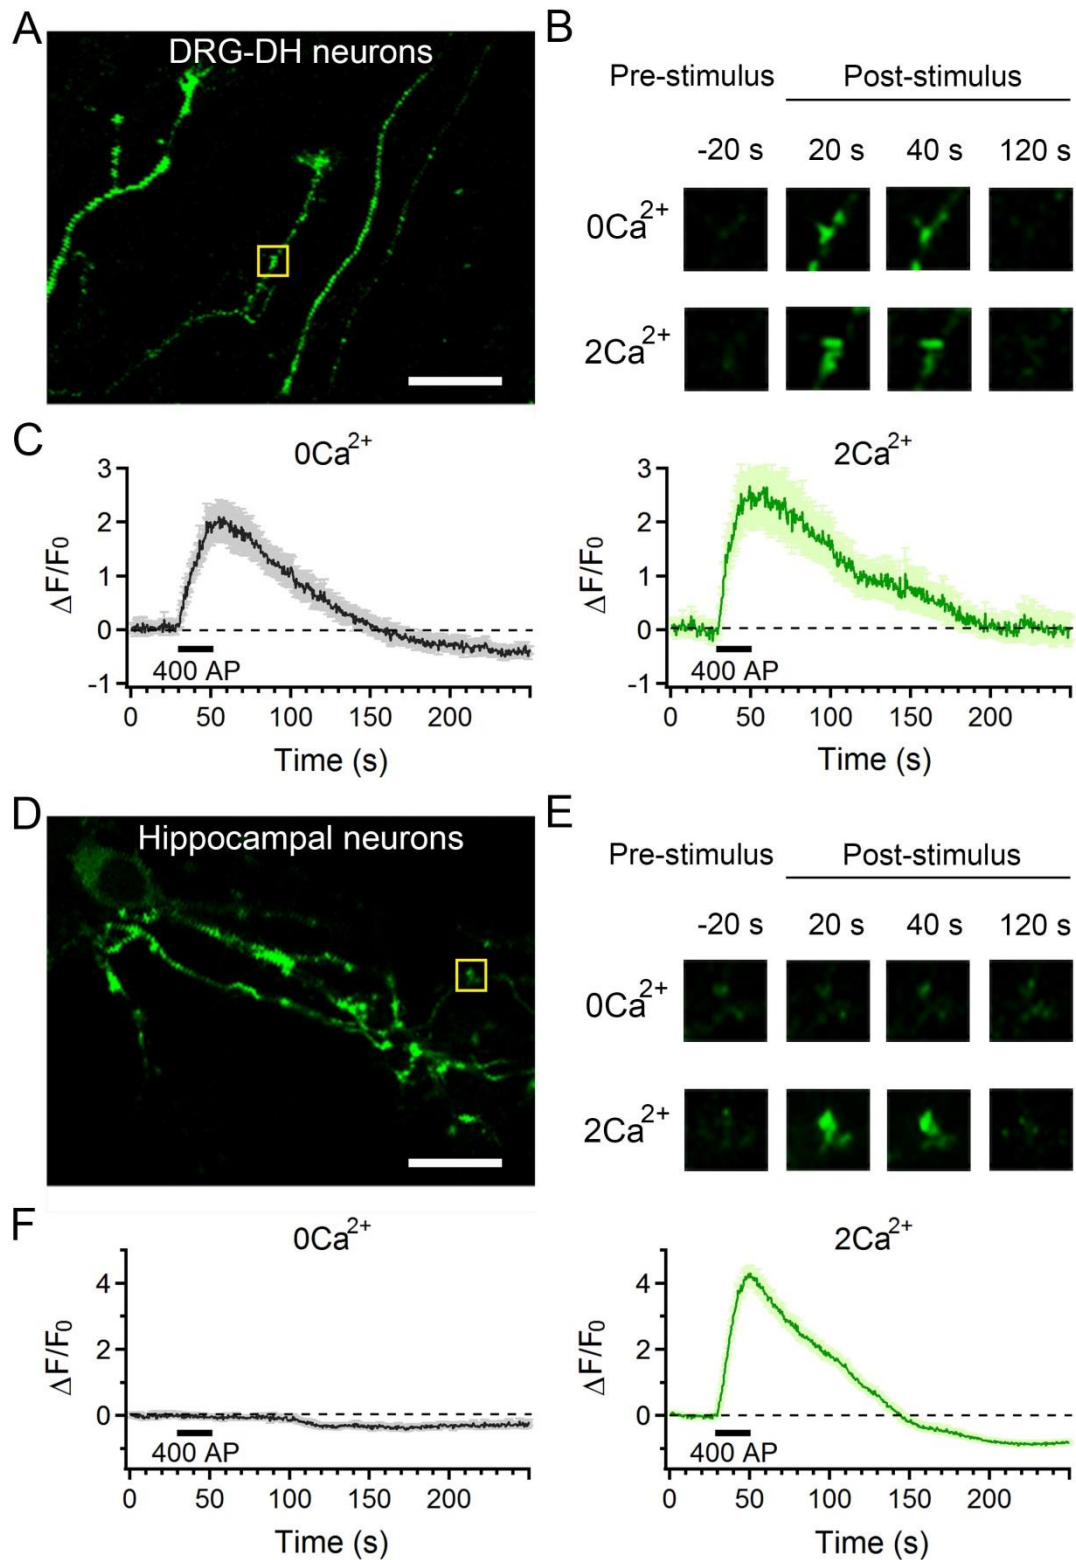

642 **Figure 2.** Imaging of CiVDS mediated synaptic transmission in co-cultured DRG and  
643 DH neurons. (A) A representative photograph showing the co-cultured DRG and DH  
644 neurons. The DRG neurons were expressed with Spy-pHluorin for imaging the

645 synaptic transmission. Scale bar, 10  $\mu\text{m}$ . (B) Images of a presynaptic bouton marked  
646 in (A) showing the Spy-pHluorin fluorescence at 20 s before (-20 s, pre-stimulus), 20  
647 s, 40 s, and 120 s after electrical stimulation (post-stimulus) in  $0\text{Ca}^{2+}$  (upper panel) or  
648  $2\text{Ca}^{2+}$  (lower panel) solution. (C) Averaged fluorescence changes ( $\Delta F/F_0$ ) of  
649 Spy-pHluorin in  $0\text{Ca}^{2+}$  (left) or  $2\text{Ca}^{2+}$  solution (right) in response to the same  
650 electrical stimulation (20 Hz, 20 s) ( $n = 45$  puncta from 6 cells for  $0\text{Ca}^{2+}$  and 57  
651 puncta from 6 cells for  $2\text{Ca}^{2+}$ ). The shadow in the traces represents the error bars  
652 (s.e.m) of each point. (D-F) The same as in (A-C), but the experiments were  
653 performed in cultured hippocampal neurons ( $n = 70$  puncta from 3 cells for  $0\text{Ca}^{2+}$  and  
654 72 puncta from 3 cells for  $2\text{Ca}^{2+}$ ).  
655

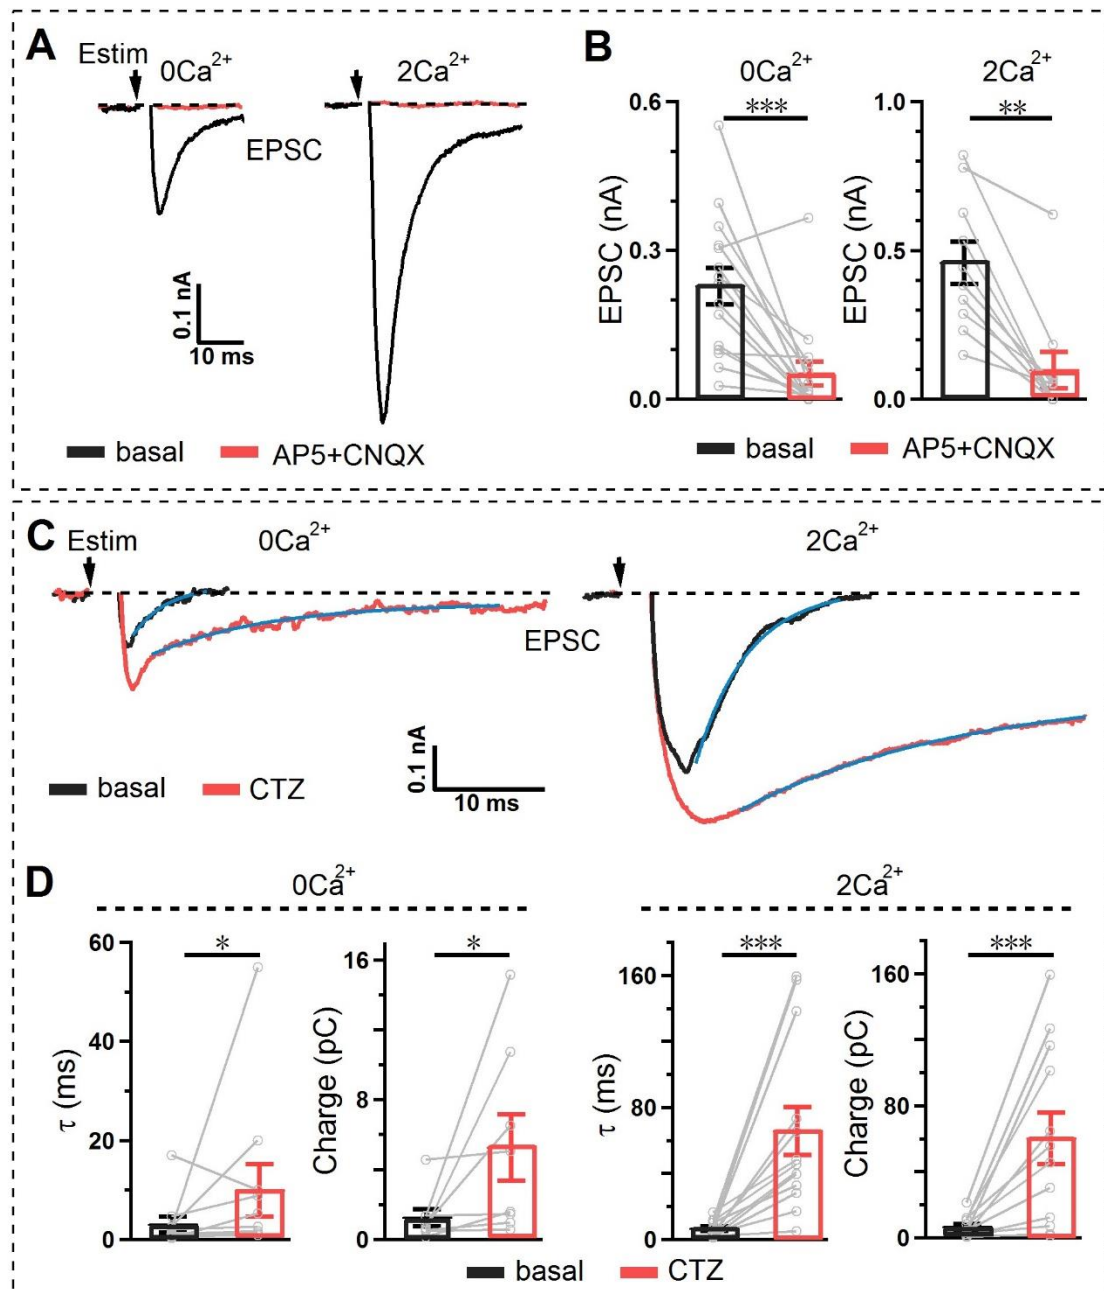

656

657 **Figure 3.** The CiVDS-EPSC is mediated by glutamate transmission. (A)

658 Representative evoked EPSCs in DH neurons co-cultured with DRG neurons before

659 (black) and after (red) applying 50  $\mu$ M AP-5 and 10  $\mu$ M CNQX in  $Ca^{2+}$ -free (left) or 2

660 mM  $Ca^{2+}$ -containing solution (right). The EPSCs of  $0Ca^{2+}$  and  $2Ca^{2+}$  were recorded in

661 2 different DH neurons. (B) Quantification of EPSC amplitudes as in (A) (n = 15 cells

662 for  $0Ca^{2+}$  and 10 cells for  $2Ca^{2+}$ ). (C) Evoked EPSCs recorded in DH neurons

663 co-cultured with DRG neurons before (black) and after (red) applying 100  $\mu\text{M}$   
664 cyclothiazide (CTZ) in  $0\text{Ca}^{2+}$  (left) or  $2\text{Ca}^{2+}$  solution (right). The traces are fitted with  
665 a single exponential curve (blue). The EPSCs of  $0\text{Ca}^{2+}$  and  $2\text{Ca}^{2+}$  were recorded in 2  
666 different DH neurons. (D) Quantification of the decay time ( $\tau$ ) and charge as in (C) ( $n$   
667 = 10 cells for  $0\text{Ca}^{2+}$  and 12 cells for  $2\text{Ca}^{2+}$ ). EPSCs were evoked by local electrical  
668 stimulation (Estim) at arrows. Data are shown as the mean  $\pm$  s.e.m.; paired Student's  $t$   
669 test; \* $p < 0.05$ , \*\* $p < 0.01$ , \*\*\* $p < 0.001$ .

670

671

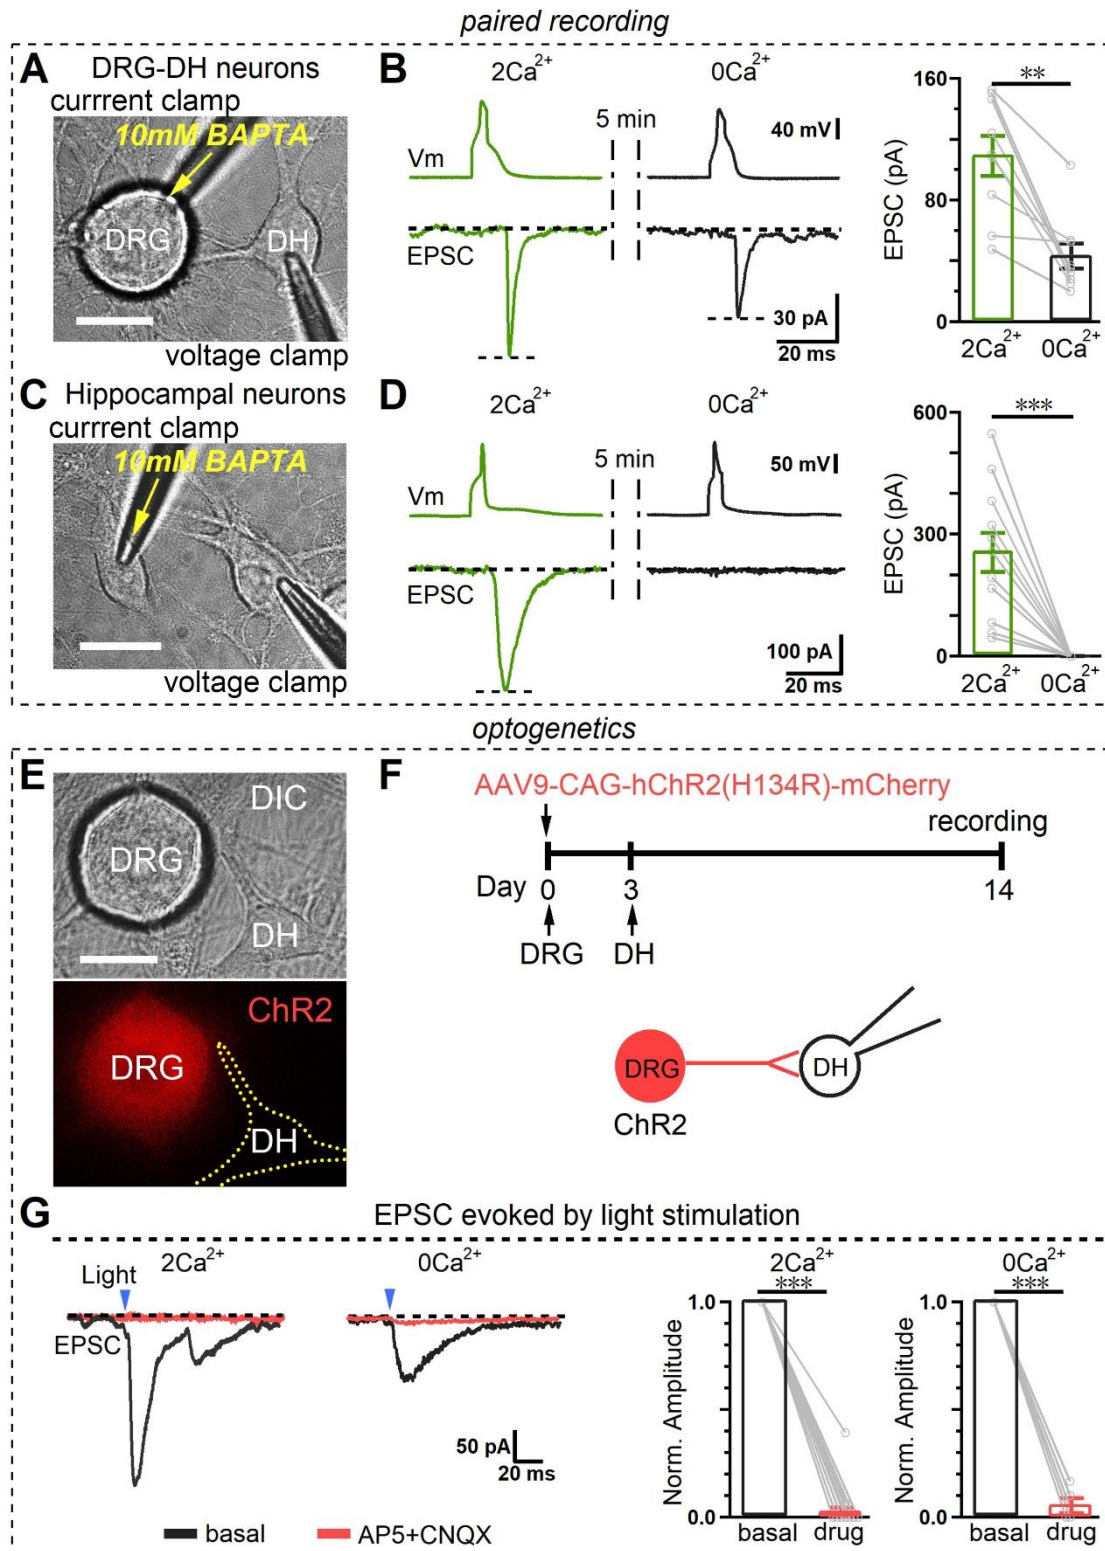

672 **Figure 4.** Presynaptic DRG neurons elicit CiVDS-EPSCs in postsynaptic DH neurons.

673 (A) Setup for paired patch-clamp recording of dorsal root ganglion (DRG) and dorsal

674 horn (DH) neurons in co-culture. The presynaptic DRG neuron was whole-cell

675 dialyzed with 10 mM BAPTA under current-clamp mode, while the postsynaptic DH  
676 neuron was in voltage-clamp mode. (B) Left, representative dual recordings of  
677 presynaptic action potentials (upper) and postsynaptic EPSCs (lower) following  
678 current-step injection (1000 pA, 5 ms) in a DRG neuron dialyzed with 10 mM  
679 BAPTA. Following whole-cell break-in and intracellular BAPTA dialysis, double  
680 recordings were performed at 0 min / 2.5 mM Ca<sup>2+</sup> bath (green), and 5 min / 0 Ca<sup>2+</sup>  
681 bath (black), Right, statistics of EPSC amplitudes (n = 9 cells). (C and D) As in (A  
682 and B), except that EPSCs were recorded from cultured hippocampal neurons (n = 11  
683 cells). (E) Image showing a DRG neuron infected by ChR2-mCherry AAV2/9 virus  
684 and a co-cultured DH neuron. (F) Upper, diagram showing the protocol for infection  
685 of DRG neurons by ChR2-mCherry virus and co-culture with DH neurons; lower,  
686 cartoon of EPSC recording from DH neurons co-cultured with ChR2-expressing DRG  
687 neurons. (G) Left, typical EPSCs from DH neurons induced by light stimulation (475  
688 nm, 5 ms, at arrows) of co-cultured ChR2-expressing DRG neurons in Ca<sup>2+</sup>-free or 2  
689 mM Ca<sup>2+</sup>-containing solution before (black) and after (red) exposure to 50 μM AP5  
690 and 10 μM CNQX. The EPSCs of 0Ca<sup>2+</sup> and 2Ca<sup>2+</sup> were recorded in 2 different DH  
691 neurons; right, statistics of EPSC amplitude (n = 5 cells for 0Ca<sup>2+</sup> and 14 for 2Ca<sup>2+</sup>).  
692 Data are shown as the mean ± s.e.m.; Wilcoxon test for B; paired Student's *t* test for D  
693 and G; \*\*p <0.01, \*\*\*p <0.001. Scale bars, 20 μm.  
694



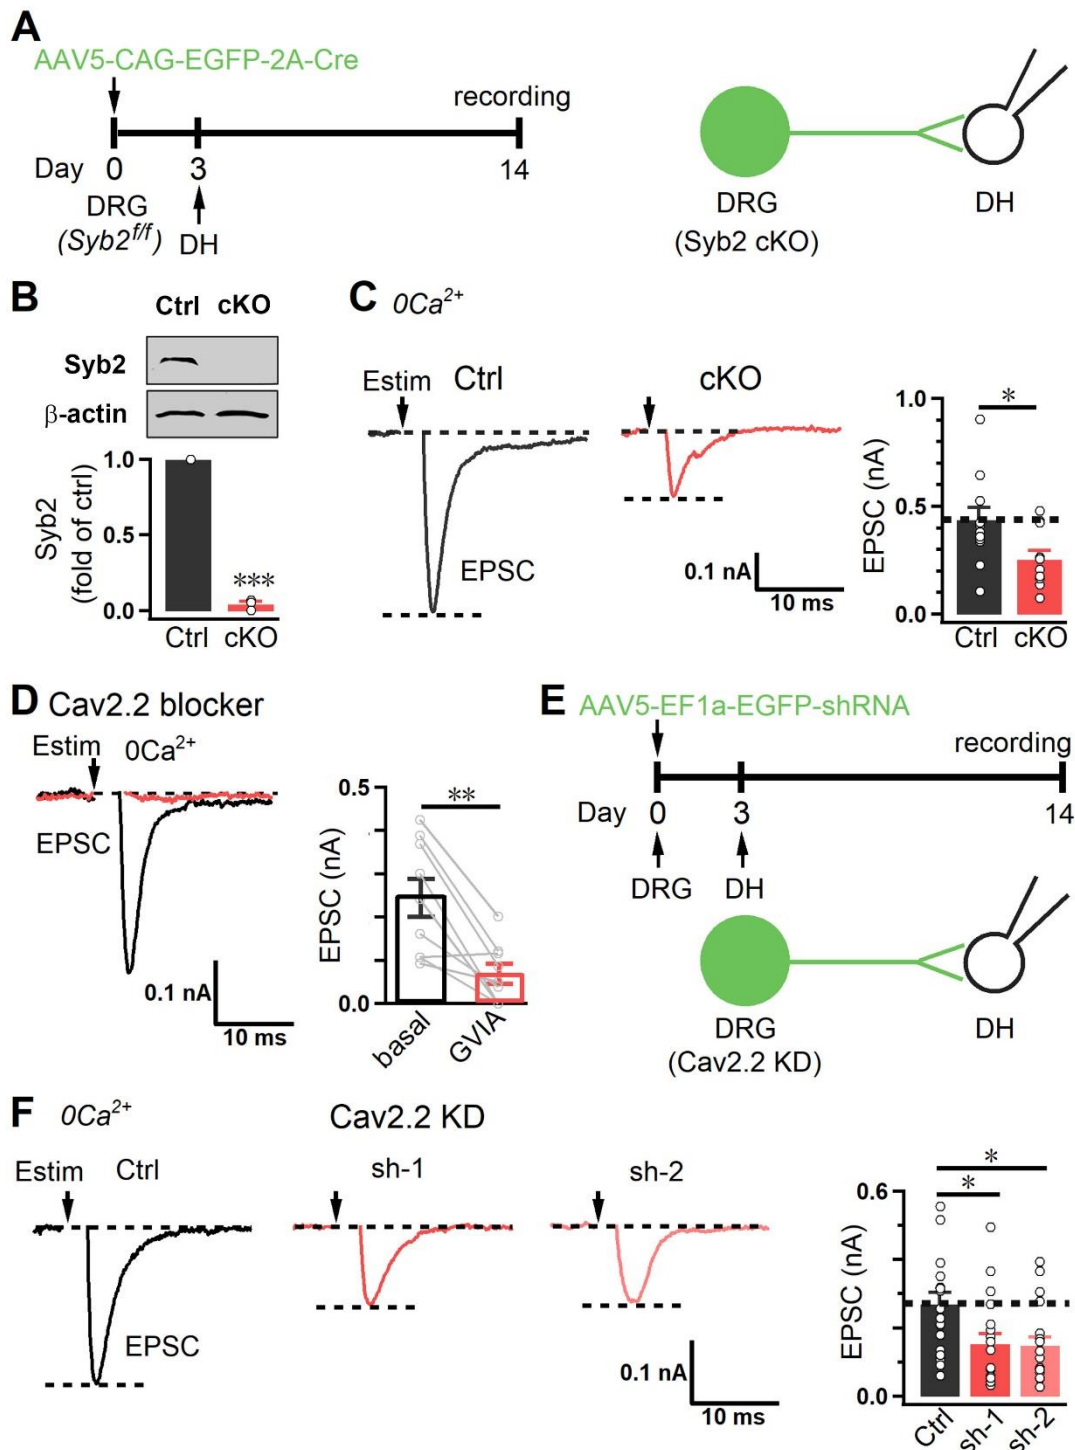

695

696 **Figure 5.** CiVDS-EPSCs are mediated by the SNARE complex and N-type

697 Ca<sup>2+</sup>-channels. (A) Left, diagram showing the protocol for EPSC recording from DH

698 neurons co-cultured with Syb2-knockout (cKO) DRG neurons; right, cartoon of EPSC

699 recording from DH neurons co-cultured with Syb2-cKO DRG neurons. (B)

700 Representative western blots (upper) and analysis (lower) of the expression levels of  
701 Syb2 in control (Ctrl) and Syb2-cKO DRG neurons (n = 3 per group). (C) Evoked  
702 EPSCs and statistics from DH neurons co-cultured with control (Ctrl) or Syb2-cKO  
703 DRG cells (cKO) in  $0\text{Ca}^{2+}$  solution (n = 13 cells for Ctrl and 11 for cKO). (D) Evoked  
704 EPSCs and statistics from DH neurons co-cultured with DRG neurons before (black)  
705 and after (red) applying  $1\ \mu\text{M}$   $\omega$ -conotoxin-GVIA (GVIA) in  $0\text{Ca}^{2+}$  bath (n = 9 cells).  
706 (E) Upper, diagram showing the protocol for EPSC recordings from DH neurons  
707 co-cultured with Cav2.2 knockdown (KD) DRG neurons; lower, cartoon of EPSC  
708 recording from DH neurons co-cultured with Cav2.2-KD DRG neurons. (F) Left  
709 panels, evoked EPSCs from DH neurons co-cultured with control (Ctrl) or Cav2.2-KD  
710 (sh-1/sh-2) DRG neurons in  $0\text{Ca}^{2+}$  solution. Right panel, quantification of evoked  
711 EPSCs (n = 17 cells for Ctrl, 12 for sh-1, and 19 for sh-2). EPSCs were evoked by  
712 local electrical stimulation (Estim, at arrows). Data are shown as the mean  $\pm$  s.e.m.;  
713 paired Student's *t* test for B and D, unpaired Student's *t* test for C, and Kruskal-Wallis  
714 test followed by Dunn's multiple comparisons test for F; \*p <0.05, \*\*p <0.01, \*\*\*p  
715 <0.001.

716

717



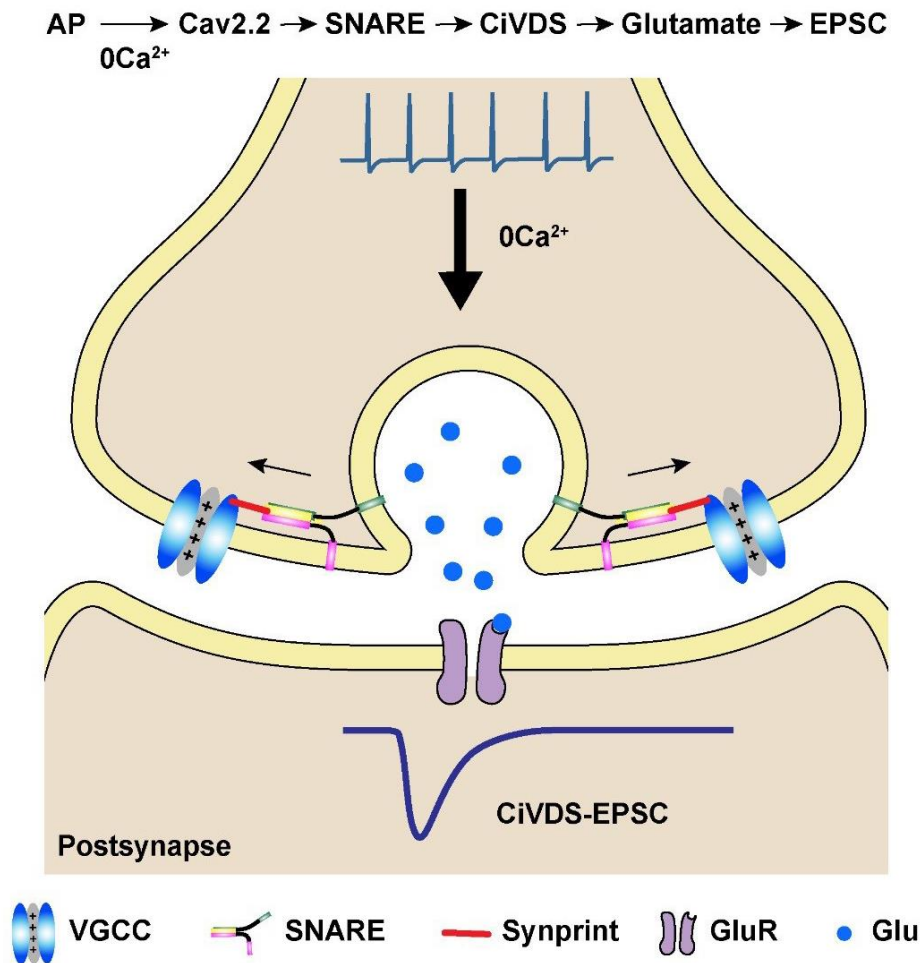

718 **Figure 6.** A model of the CiVDS-mediated EPSC in synaptic transmission. In  
719  $Ca^{2+}$ -free bath, an action potential activates the voltage-gated  $Ca^{2+}$  channel  
720 (VGCC/Cav2.2) and triggers presynaptic glutamate release through  $Ca^{2+}$ -independent  
721 but voltage-dependent secretion (CiVDS), and activates an excitatory postsynaptic  
722 current (CiVDS-EPSC). In physiological solution containing  $Ca^{2+}$ , however, both  
723 CiVDS- and  $Ca^{2+}$ -dependent secretion (CDS)-mediated glutamate release contribute  
724 to a larger evoked postsynaptic EPSC (not shown).

725

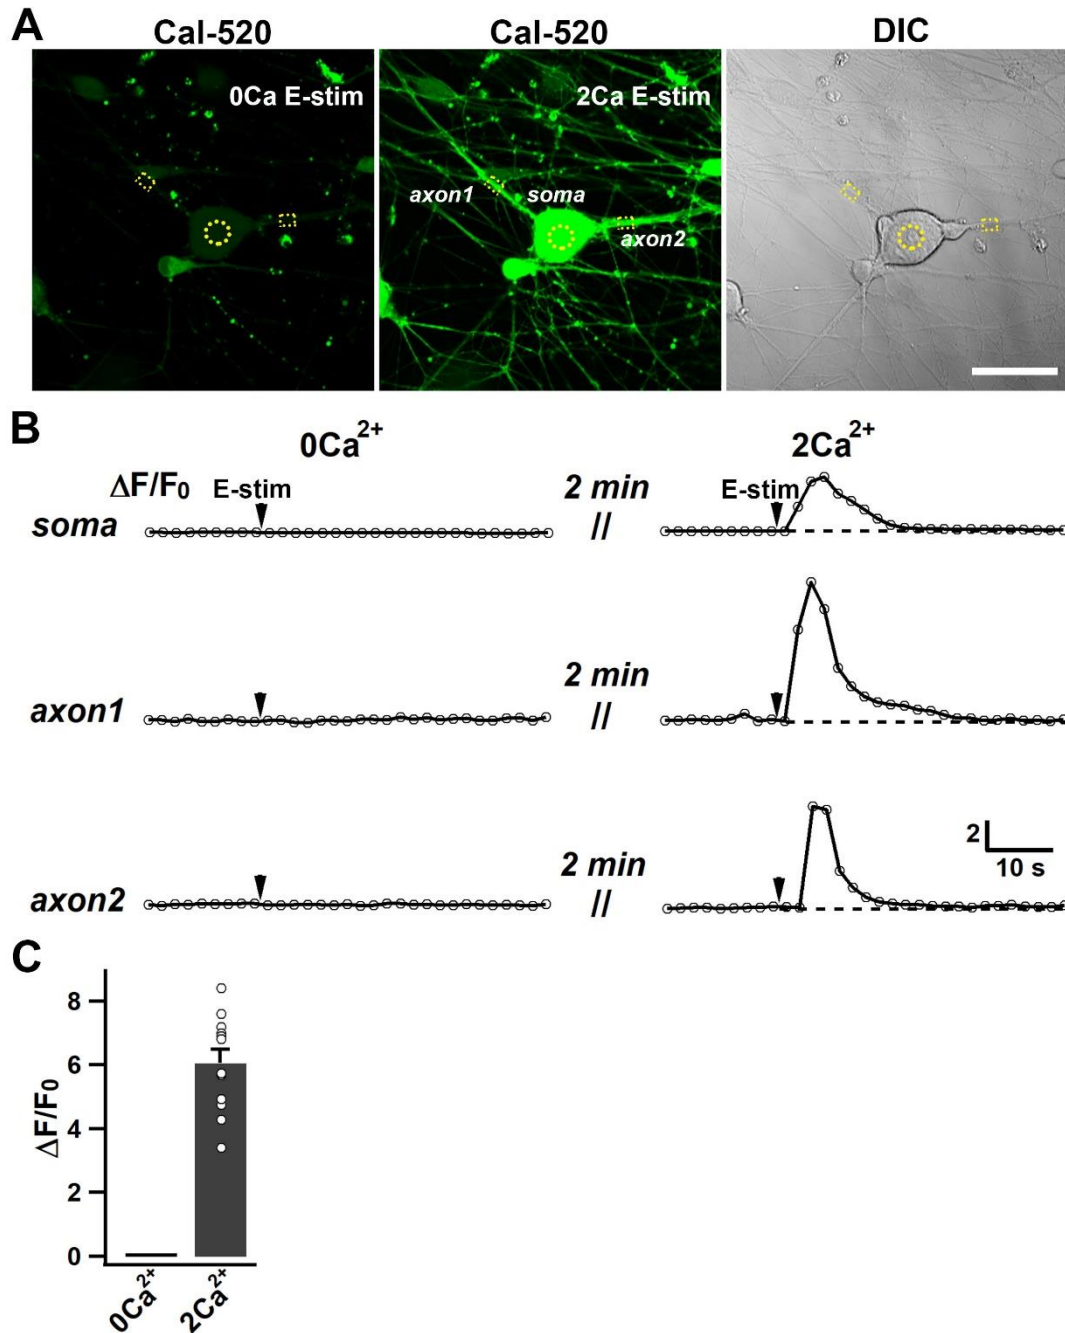

726

727 **Figure 1—figure supplement 1.** Absence of intracellular Ca<sup>2+</sup> signal ( $\Delta F/F_0$ ) in DRG  
728 neurons in Ca<sup>2+</sup>-free solution. (A) Representative images showing the loading of  
729 Cal-520 in co-cultured DRG and DH neurons (scale bar, 50  $\mu$ m; DIC, differential  
730 interference contrast). (B) Ca<sup>2+</sup> signal  $\Delta F/F_0$  of Cal-520 fluorescence induced by

731 electrical stimulation (E-stim at arrows) in  $\text{Ca}^{2+}$ -free (left) and 2 mM  $\text{Ca}^{2+}$ -containing  
732 solution (right) from typical regions labeled in (A). (C) Statistics of  $[\text{Ca}^{2+}]_i$  rise as in  
733 (B) ( $n = 12$  cells). No  $[\text{Ca}^{2+}]_i$  rise in  $\text{Ca}^{2+}$ -free solution was detectable. Data are shown  
734 as the mean  $\pm$  s.e.m. Student's  $t$  test for (C); \*\*\* $p < 0.001$ .

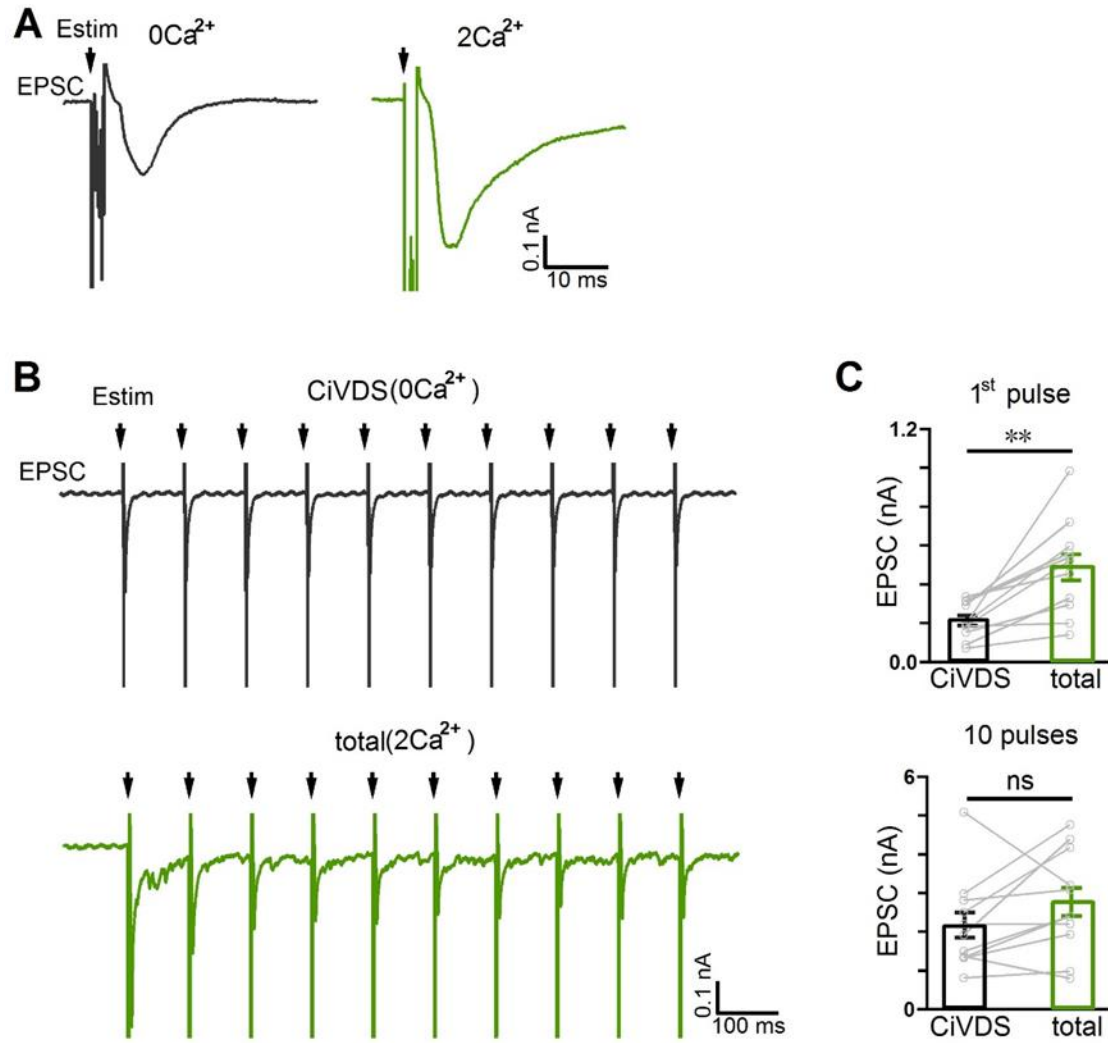

735

736 **Figure 1—figure supplement 2.** EPSCs evoked by local-field electrical stimuli from  
737 DH neurons co-cultured with DRG neurons. (A) Original recordings of EPSCs  
738 including artifacts in response to a single electrical stimulus (Estim, arrows) in  $0Ca^{2+}$   
739 ( $0Ca^{2+}$  and  $2Ca^{2+}$  were recorded in different DH neurons. (B) As in (A) for CiVDS ( $0Ca^{2+}$ ) or total (CiVDS  
740 +CDS,  $2Ca^{2+}$ ), but in response to a 10-Hz train of 10 pulses. The EPSCs of  $0Ca^{2+}$  and  
741  $2Ca^{2+}$  were recorded in different DH neurons. (C) Statistics of CiVDS-EPSC ( $0Ca^{2+}$ ,  
742 black) and total (CDS + CiVDS)-EPSC ( $2Ca^{2+}$ , green) evoked by single (first) pulse  
743 or 10 pulses during 10-Hz train stimulation as in (B) (n = 11 cells). Data are shown as  
744

745 mean  $\pm$  s.e.m.; paired Student's *t* test for (C), \*\**p* < 0.01, ns, not significant.

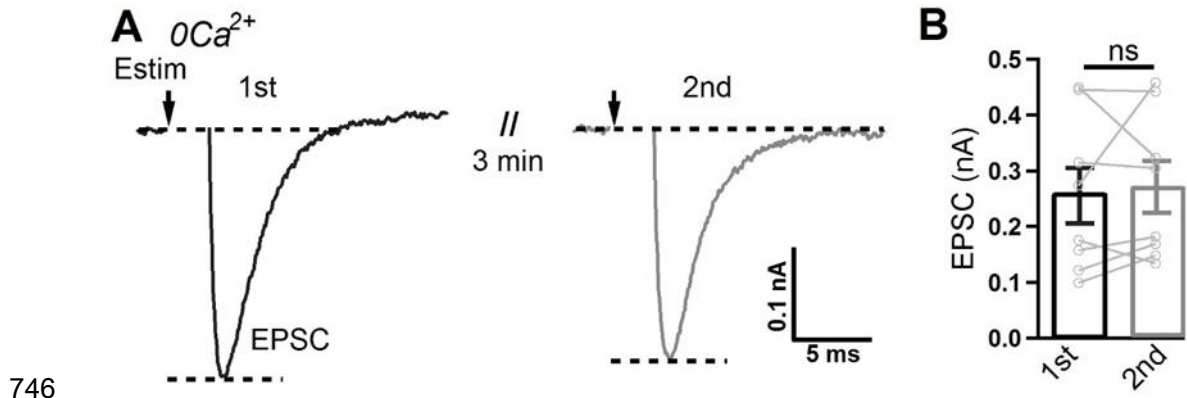

746

747 **Figure 3—figure supplement 1.** CiVDS-EPSC is reproducible during a repeated

748 stimulus. (A) CiVDS-EPSCs induced by electrical stimulation (Estim, arrows)

749 repeated after a 3-min interval in a DH neuron co-cultured with DRG neurons in

750  $0Ca^{2+}$  solution. (B) Quantification of EPSC amplitude as in (A) ( $n = 8$  cells). Data are

751 shown as the mean  $\pm$  s.e.m.; paired Student's  $t$  test for (B); ns, not significant.

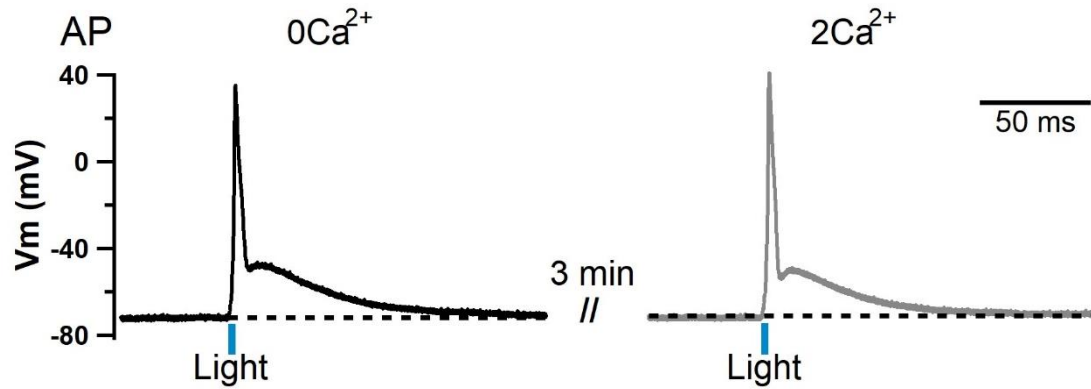

752

753 **Figure 4—figure supplement 1.** Light-evoked action potentials in DRG neurons  
754 expressing ChR2. Representative action potentials (APs) evoked by light stimulation  
755 (475 nm, 5 ms) in a ChR2-expressing DRG neuron in  $0\text{Ca}^{2+}$  (left) and  $2\text{Ca}^{2+}$  (right)  
756 solutions.

757

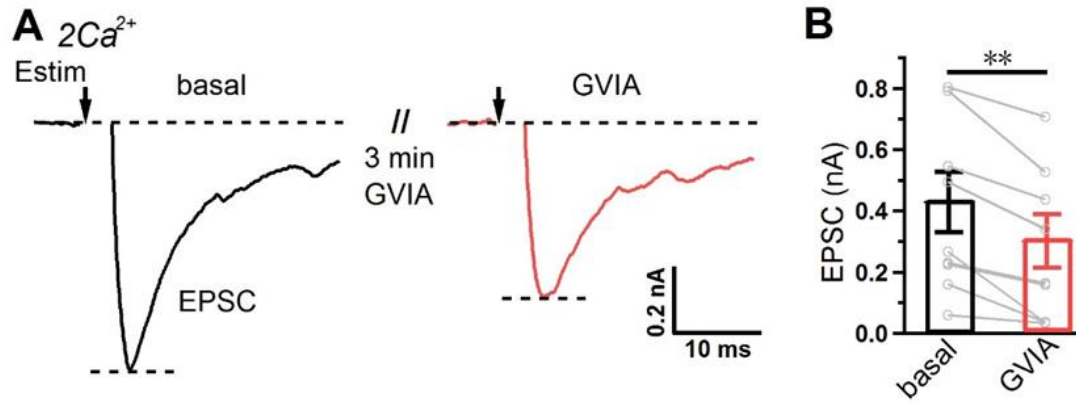

758

759 **Figure 5—figure supplement 1.** EPSCs in DH neurons co-cultured with DRG

760 neurons are partially blocked by the Cav2.2 inhibitor GVIA. (A) EPSCs induced by

761 electrical stimulation (Estim, at arrows) in a DH neuron co-cultured with DRG

762 neurons before (black) and after (red) 1  $\mu$ M  $\omega$ -conotoxin-GVIA (GVIA) application in

763  $2Ca^{2+}$  solution. (B) Quantification of EPSC amplitudes as in (A) (n = 9 cells). Data

764 are shown as the mean  $\pm$  s.e.m.; paired Student's *t* test for (B); \*\**p* < 0.01.

765



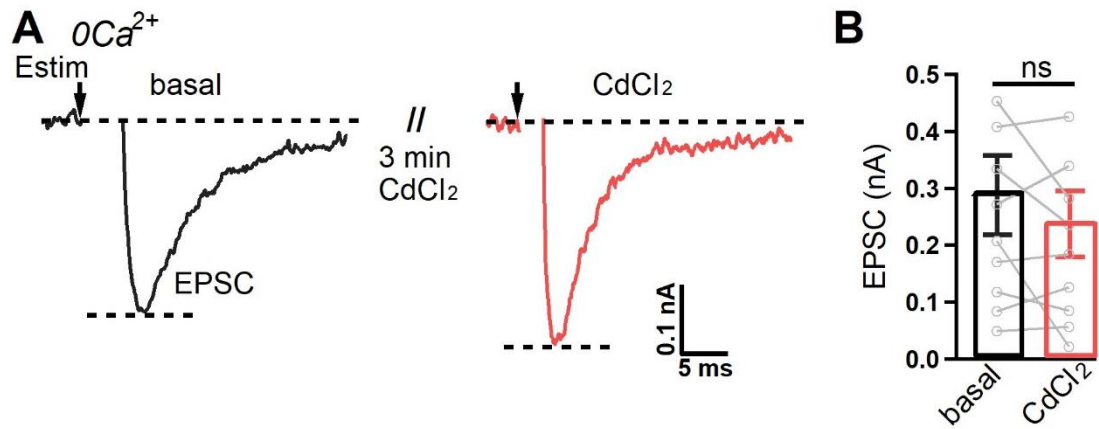

766 **Figure 5—figure supplement 2.** CiVDS-EPSCs in DH neurons co-cultured with  
767 DRG neurons are insensitive to CdCl<sub>2</sub>. (A) EPSCs induced by electrical stimulation  
768 (Estim, arrows) in a DH neuron co-cultured with DRG neurons before (basal) and  
769 after 100  $\mu$ M CdCl<sub>2</sub> application (CdCl<sub>2</sub>) in  $0Ca^{2+}$  solution. (B) Quantification of  
770 EPSC amplitudes as in (A) (n = 10 cells). Data are shown as the mean  $\pm$  s.e.m.; paired  
771 Student's *t* test for (B); ns, not significant.  
772

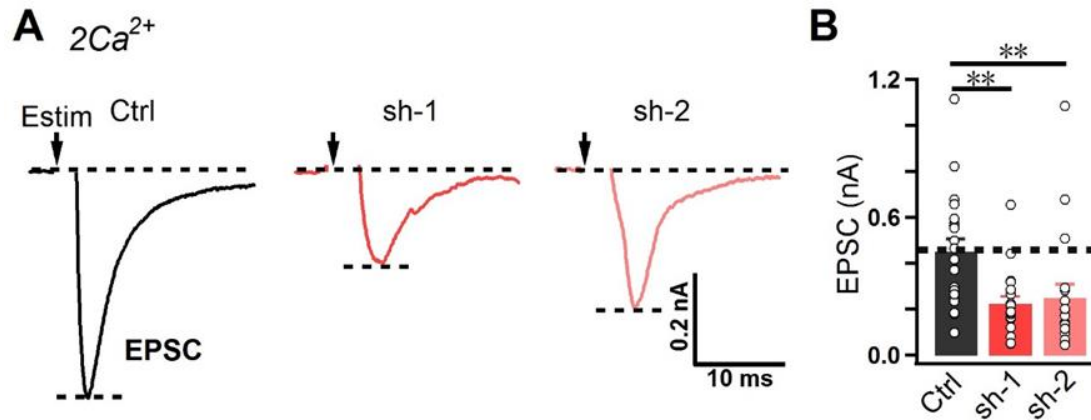

773

774 **Figure 5—figure supplement 3.** EPSCs in DH neurons co-cultured with DRG

775 neurons are partially blocked by Cav2.2 knockdown. (A) Typical EPSCs induced by

776 electrical stimulation (Estim, arrows) in DH neurons co-cultured with control (Ctrl) or

777 Cav2.2-KD virus (sh-1/sh-2)-infected DRG neurons in 2 mM  $\text{Ca}^{2+}$ -containing

778 solution. (B) Quantification of EPSC amplitude as in (A) (n = 18 cells for Ctrl, 15 for

779 sh-1, and 19 for sh-2). Data are shown as the mean  $\pm$  s.e.m.; Kruskal-Wallis test

780 followed by Dunn's multiple comparisons test for (B); \*\*p < 0.01.

781

782

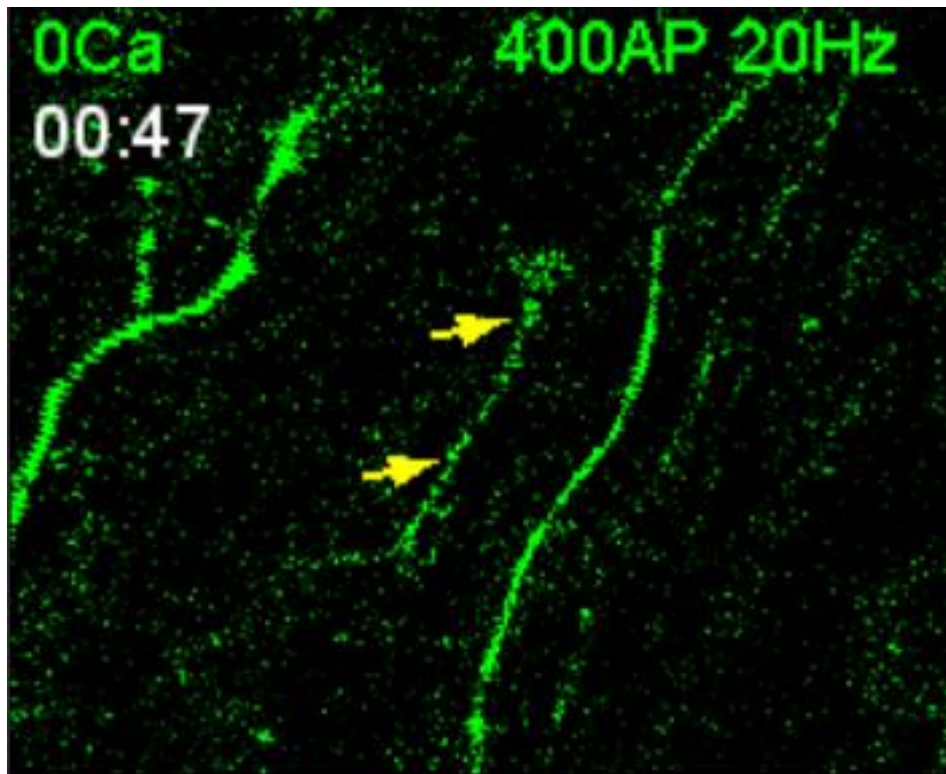

783

784 **Figure 2-video 1. Spy-pHluorin signal from DRG-DH neuron in 0Ca solution.**

785

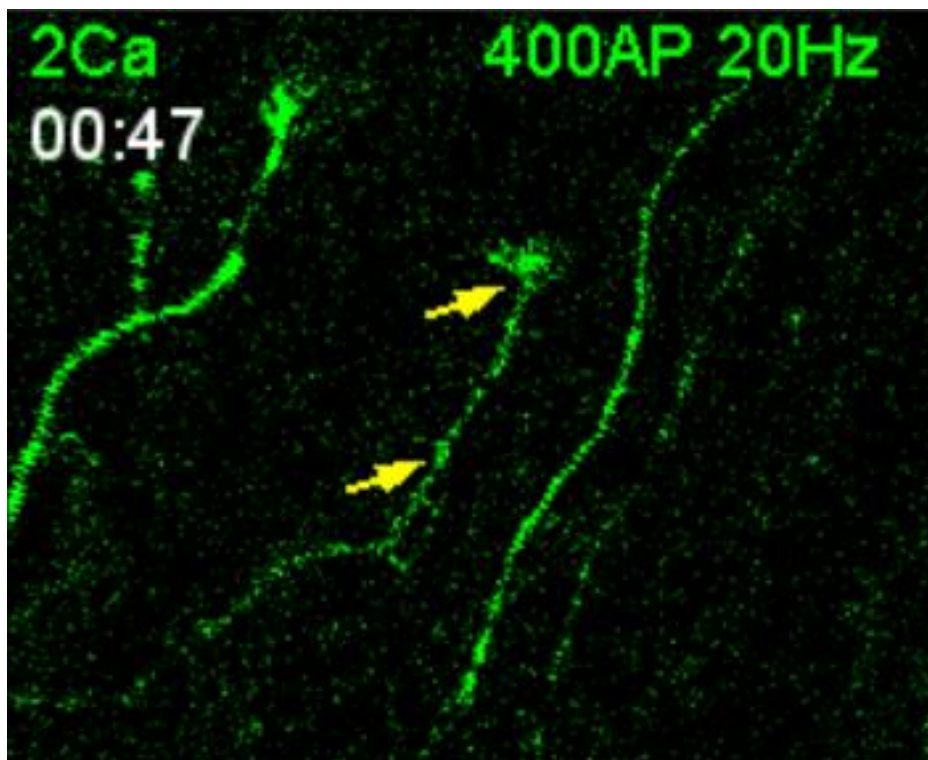

786

787 **Figure 2-video 2. Spy-pHluorin signal from DRG-DH neuron in 2Ca solution.**

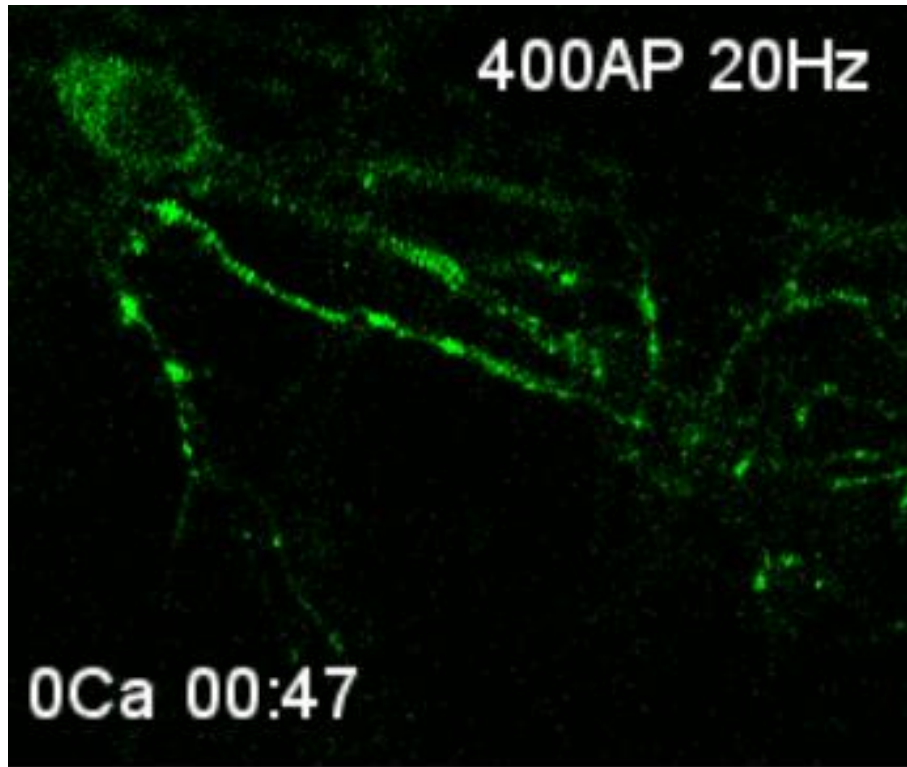

788

789 **Figure 2-video 3. Spy-pHluorin signal from hippocampal neuron in 0Ca solution.**

790

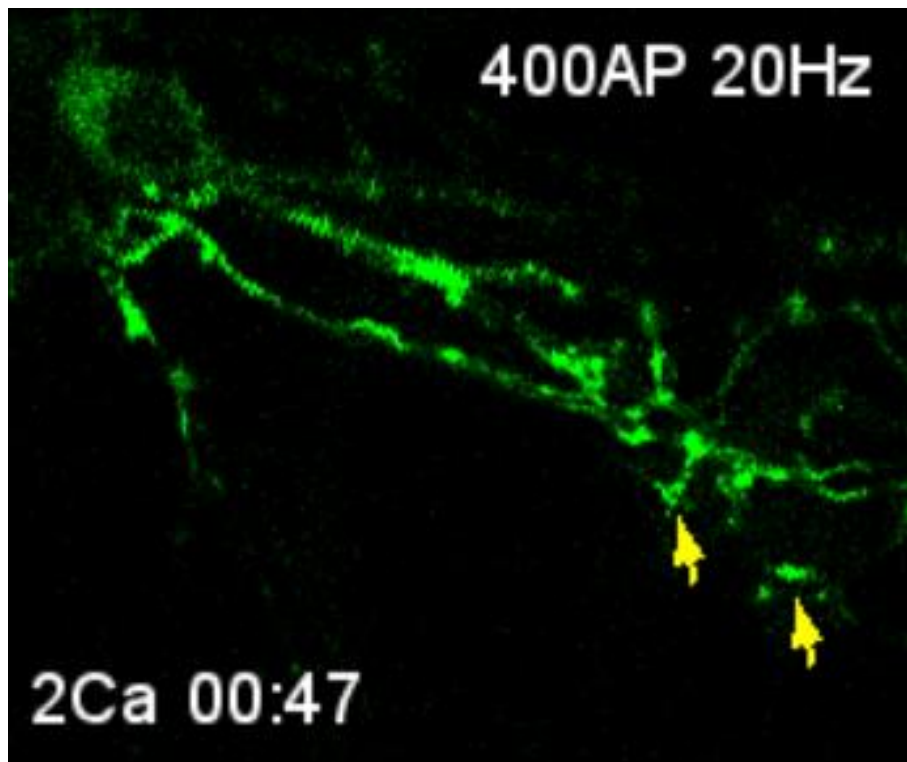

791

792 **Figure 2-video 4. Spy-pHluorin signal from hippocampal neuron in 2Ca solution.**
